# Supplementary material for: Iridium-catalyzed selective α-methylation of ketones with methanol
Source: Royal Society of Chemistry journal article supplement (doi:10.1039/c3cc49626k), 2014-01-01

Electronic Supporting information for

**Iridium-catalyzed selective  $\alpha$ -methylation of ketones with methanol**

Shinji Ogawa, Yasushi Obora\*

*Department of Chemistry and Materials Engineering, Faculty of Chemistry,  
Materials and Bioengineering, Kansai University, Suita, Osaka 564-8680, Japan*

**Table of Contents**

|      |                                                                                                     |
|------|-----------------------------------------------------------------------------------------------------|
| S2:  | Fig. S1-2                                                                                           |
| S3:  | General and Experimental procedure                                                                  |
| S4:  | Spectra data of <b>3i</b>                                                                           |
| S4:  | References                                                                                          |
| S5:  | Copies of $^1\text{H}$ (400 MHz, $\text{CDCl}_3$ ) and $^{13}\text{C}$ NMR spectra for <b>3a</b> .  |
| S6:  | Copies of $^1\text{H}$ (400 MHz, $\text{CDCl}_3$ ) and $^{13}\text{C}$ NMR spectra for <b>3b</b> .  |
| S7:  | Copies of $^1\text{H}$ (400 MHz, $\text{CDCl}_3$ ) and $^{13}\text{C}$ NMR spectra for <b>3c</b> .  |
| S8:  | Copies of $^1\text{H}$ (400 MHz, $\text{CDCl}_3$ ) and $^{13}\text{C}$ NMR spectra for <b>3d</b> .  |
| S9:  | Copies of $^1\text{H}$ (400 MHz, $\text{CDCl}_3$ ) and $^{13}\text{C}$ NMR spectra for <b>3e</b> .  |
| S10: | Copies of $^1\text{H}$ (400 MHz, $\text{CDCl}_3$ ) and $^{13}\text{C}$ NMR spectra for <b>3f</b> .  |
| S11: | Copies of $^1\text{H}$ (400 MHz, $\text{CDCl}_3$ ) and $^{13}\text{C}$ NMR spectra for <b>3g</b> .  |
| S12: | Copies of $^1\text{H}$ (400 MHz, $\text{CDCl}_3$ ) and $^{13}\text{C}$ NMR spectra for <b>3h</b> .  |
| S13: | Copies of $^1\text{H}$ (400 MHz, $\text{CDCl}_3$ ) and $^{13}\text{C}$ NMR spectra for <b>3i</b> .  |
| S14: | Copies of $^1\text{H}$ (400 MHz, $\text{CDCl}_3$ ) and $^{13}\text{C}$ NMR spectra for <b>3j</b> .  |
| S15: | Copies of $^1\text{H}$ (400 MHz, $\text{CDCl}_3$ ) and $^{13}\text{C}$ NMR spectra for <b>3k</b> .  |
| S16: | Copies of $^1\text{H}$ (400 MHz, $\text{CDCl}_3$ ) and $^{13}\text{C}$ NMR spectra for <b>3k'</b> . |
| S17: | Copies of $^1\text{H}$ (400 MHz, $\text{CDCl}_3$ ) and $^{13}\text{C}$ NMR spectra for <b>6a</b> .  |
| S18: | Copies of $^1\text{H}$ (400 MHz, $\text{CDCl}_3$ ) and $^{13}\text{C}$ NMR spectra for <b>6b</b> .  |
| S19: | Copies of $^1\text{H}$ (400 MHz, $\text{CDCl}_3$ ) and $^{13}\text{C}$ NMR spectra for <b>6c</b> .  |
| S20: | Copies of $^1\text{H}$ (400 MHz, $\text{CDCl}_3$ ) and $^{13}\text{C}$ NMR spectra for <b>8aa</b> . |
| S21: | Copies of $^1\text{H}$ (400 MHz, $\text{CDCl}_3$ ) and $^{13}\text{C}$ NMR spectra for <b>8ba</b> . |
| S22: | Copies of $^1\text{H}$ (400 MHz, $\text{CDCl}_3$ ) and $^{13}\text{C}$ NMR spectra for <b>8ca</b> . |
| S23: | Copies of $^1\text{H}$ (400 MHz, $\text{CDCl}_3$ ) and $^{13}\text{C}$ NMR spectra for <b>8la</b> . |
| S24: | Copies of $^1\text{H}$ (400 MHz, $\text{CDCl}_3$ ) and $^{13}\text{C}$ NMR spectra for <b>8ab</b> . |
| S25: | Copies of $^1\text{H}$ (400 MHz, $\text{CDCl}_3$ ) and $^{13}\text{C}$ NMR spectra for <b>8ac</b> . |
| S26: | Copies of $^1\text{H}$ (400 MHz, $\text{CDCl}_3$ ) and $^{13}\text{C}$ NMR spectra for <b>8ad</b> . |
| S27: | Copies of $^1\text{H}$ (400 MHz, $\text{CDCl}_3$ ) and $^{13}\text{C}$ NMR spectra for <b>8ae</b> . |

**Fig. S1.** Time-course monitoring of reaction of **1k** with **2**.

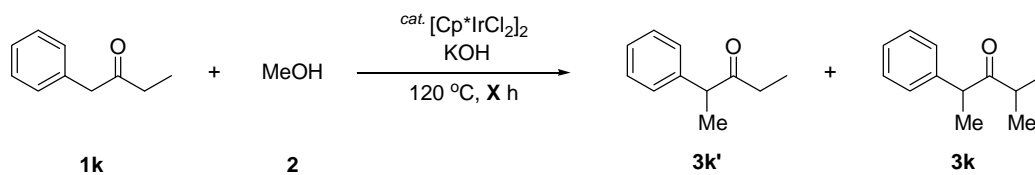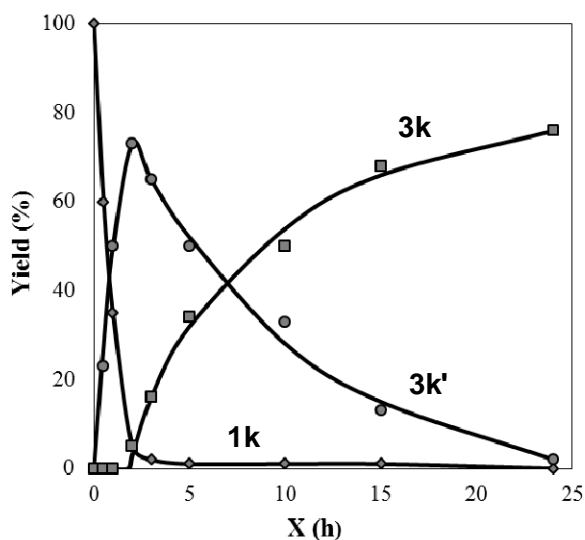

A mixture of  $[\text{Cp}^*\text{IrCl}_2]_2$  (40 mg, 0.05 mmol), KOH (28 mg, 0.5 mmol), **1k** (0.15 g, 1.0 mmol) and **2** (1.5 mL) was stirred at 120 °C for **X** h under Ar in a pressure tube. The conversions and yields of products were estimated from peak areas based on an internal standard using GC.

**Fig. S2.** Plausible reaction pathway

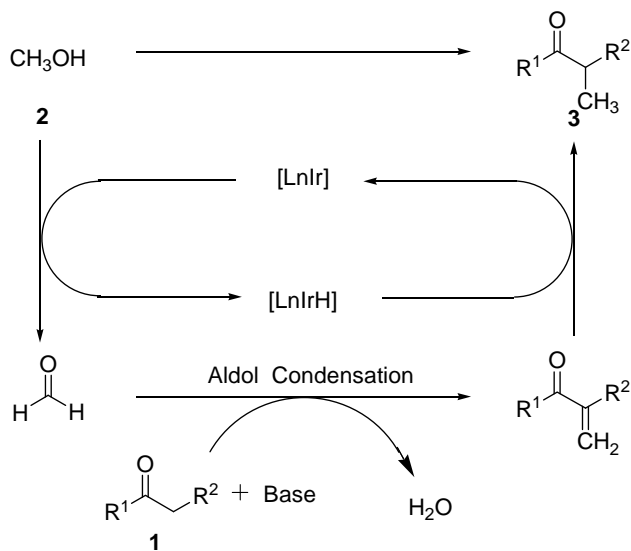

## General

GC analysis was performed with a flame ionization detector using a 0.22 mm × 25 m capillary column (BP-5). <sup>1</sup>H and <sup>13</sup>C NMR were measured at 400 and 100 MHz, respectively, in CDCl<sub>3</sub> with Me<sub>4</sub>Si as the internal standard. The products were characterized by <sup>1</sup>H NMR, <sup>13</sup>C NMR, and GC-MS. The yields of products were estimated from the peak areas based on the internal standard technique using GC.

Compounds **3a**,<sup>1</sup> **3b**,<sup>2</sup> **3c**,<sup>3</sup> **3d**,<sup>4</sup> **3e**,<sup>5</sup> **3f**,<sup>6</sup> **3g**,<sup>1</sup> **3h**,<sup>7</sup> **3j**,<sup>8</sup> **3k**,<sup>9</sup> **3k'**,<sup>9</sup> **6a**,<sup>10</sup> **6b**,<sup>11</sup> **6c**,<sup>12</sup> **8aa**,<sup>13</sup> **8ba**,<sup>14</sup> **8ca**,<sup>15</sup> **8la**,<sup>16</sup> **8ab**,<sup>17</sup> **8ac**,<sup>18</sup> **8ad**,<sup>19</sup> and **8ae**,<sup>20</sup> were reported previously.

## Experimental Procedure

**A typical reaction was carried out as follows (Table 1, entry 1):** A mixture of [Cp\*IrCl<sub>2</sub>]<sub>2</sub> (40 mg, 0.05 mmol), KOH (28 mg, 0.5 mmol), **1a** (0.12 g, 1 mmol) and **2** (1.5 mL) was stirred at 120 °C for 15 h under Ar in a pressure tube. The conversions and yields of products were estimated from peak areas based on an internal standard using GC and the product **3a** was obtained in 87 % yield. The product **3a** was isolated by column chromatography (230-400 mesh silica gel, *n*-hexane / ethyl acetate = 30 / 1) in 83 % yield (123 mg).

**A typical reaction was carried out as follows (Table 2, entry 1):** A mixture of [Cp\*IrCl<sub>2</sub>]<sub>2</sub> (40 mg, 0.05 mmol), KOH (28 mg, 0.5 mmol), **5a** (0.12 g, 1 mmol) and **2** (1.5 mL) was stirred at 120 °C for 15 h under Ar in a pressure tube. The product **6a** was isolated by column chromatography (230-400 mesh silica gel, *n*-hexane / ethyl acetate = 30 / 1) in 76 % yield (100 mg).

**A typical reaction was carried out as follows (Table 4, entry 1):** A mixture of [Cp\*IrCl<sub>2</sub>]<sub>2</sub> (40 mg, 0.05 mmol), KOH (28 mg, 0.5 mmol), **1a** (0.24 g, 2 mmol), **2** (1 mL) and **7a** (0.11 g, 1 mmol) was stirred at 140 °C for 15 h under Ar. The product **8aa** was isolated by column chromatography (230-400 mesh silica gel, *n*-hexane / ethyl acetate = 30 / 1) and Kugelrohr distillation (70 °C (pot) / 0.3 mmHg, 1 h) in 81 % yield (182 mg).

**A typical reaction was carried out as follows (Table 4, entry 7):** A mixture of [Cp\*IrCl<sub>2</sub>]<sub>2</sub> (40 mg, 0.05 mmol), KOH (28 mg, 0.5 mmol), **1a** (0.14 g, 1.2 mmol) and **7d** (0.10 g, 1 mmol) was stirred at 80 °C for 2 h under Ar in a pressure tube. After **2** (1.5 mL) was added, the reaction mixture was stirred at 140 °C for 15 h under Ar. The product **8ad** was isolated by column chromatography (230-400 mesh silica gel, *n*-hexane) and Kugelrohr distillation (70 °C (pot) / 0.3 mmHg, 1 h) in 89 % yield (194 mg).

**3i**:  $^1\text{H-NMR}$  ( $\text{CDCl}_3$ )  $\delta$  2.78-2.64 (m, 2H), 1.67-1.61 (m, 1H), 1.33-1.19 (m, 13H), 1.09-1.03 (m, 9H) 0.89-0.86 (t, 3H);  $^{13}\text{C-NMR}$   $\delta$  218.6 (C), 44.4 (CH), 39.6 (CH), 33.2 (CH<sub>2</sub>), 31.8 (CH<sub>2</sub>), 29.7 (CH<sub>2</sub>), 29.4 (CH<sub>2</sub>), 29.2 (CH<sub>2</sub>), 27.5 (CH<sub>2</sub>), 22.6 (CH<sub>3</sub>), 18.4 (CH<sub>3</sub>), 18.2 (CH<sub>3</sub>), 16.8 (CH<sub>3</sub>), 14.0 (CH<sub>3</sub>); IR (neat,  $\text{cm}^{-1}$ ) : 2963, 2928, 2855, 1713, 1464, 1381, 1024; GC-MS (EI)  $m/z$  (relative intensity) 212 (5)  $[\text{M}]^+$ , 169 (6), 141 (7), 113 (2), 100 (74), 99 (18), 85 (73), 71 (95), 57 (80), 43 (100), 29 (12); HRMS (EI)  $m/z$  calcd for  $\text{C}_{14}\text{H}_{28}$   $[\text{M}]^+$  212.2146, found 212.2140.

## Reference

- 1) M. Ito, S. Kitahara and T. Ikariya, *J. Am. Chem. Soc.*, 2005, **127**, 6172.
- 2) J. D. West, S. E. Stafford and M. P. Meyer, *J. Am. Chem. Soc.*, 2008, **130**, 7816.
- 3) Z. Li and V. Gevorgyan, *Angew. Chem. Int. Ed.*, 2011, **50**, 2808.
- 4) M. Jean, J. Renault, P. Uriac, M. Capet and P. Van de Weghe, *Org. Lett.*, 2007, **9**, 3623.
- 5) A. V. Malkov, K. Vrankova, S. Stoncius and P. Kocovsky, *J. Org. Chem.*, 2009, **74**, 5839.
- 6) M. Jean, J. Renault and P. Van de Weghe, *Tetrahedron Lett.*, 2009, **50**, 6546.
- 7) P. Gogoi, G. K. Sarmah and D. Konwar, *J. Org. Chem.*, 2004, **69**, 5153.
- 8) N. J. Turro, X. Lei, S. Jockusch, W. Li, Z. Liu, L. Abrams and M. F. Ottaviani, *J. Org. Chem.*, 2002, **67**, 2606.
- 9) A. J. Fry and J. P. Bujanauskas, *J. Org. Chem.*, 1978, **43**, 3157.
- 10) N. A. Strotman, S. Sommer and G. C. Fu, *Angew. Chem., Int. Ed.*, 2007, **46**, 3556.
- 11) S. Ueno, R. Maeda, S. Yasuoka and R. Kuwano, *Chem. Lett.*, 2013, **42**, 40.
- 12) L. Wu and J. F. Hartwig, *J. Am. Chem. Soc.*, 2005, **127**, 15824.
- 13) F. Wu, W. Lu, Q. Qian, Q. Ren and H. Gong, *Org. Lett.*, 2012, **14**, 3044.
- 14) J. Barluenga, E. Aguilar, J. Joglar, B. Olano and S. Fustero, *J. Org. Chem.*, 1989, **54**, 2596.
- 15) S. Samanta, B. K. Mishra, T. C. S. Pace, N. Sathyamurthy, C. Bohne and J. N. Moorthy, *J. Org. Chem.*, 2006, **71**, 4453.
- 16) D. T. Ziegler, A. M. Steffens and T. W. Funk, *Tetrahedron Lett.*, 2010, **51**, 6726.
- 17) J. A. Gautier, M. Miocque and J. P. Duclos, *Bull. Soc. Chim. Fr.*, 1969, 4356.
- 18) F. Berthiol, H. Doucet and M. Santelli, *Tetrahedron* 2006, **62**, 3142.
- 19) S. Sumino, T. Ui and I. Ryu, *Org. Lett.*, 2013, **15**, 3142.
- 20) M. Hojo, K. Sakata, N. Ushioda, T. Watanabe, H. Nishikori and A. Hosomi, *Organometallics* 2001, **20**, 5014.

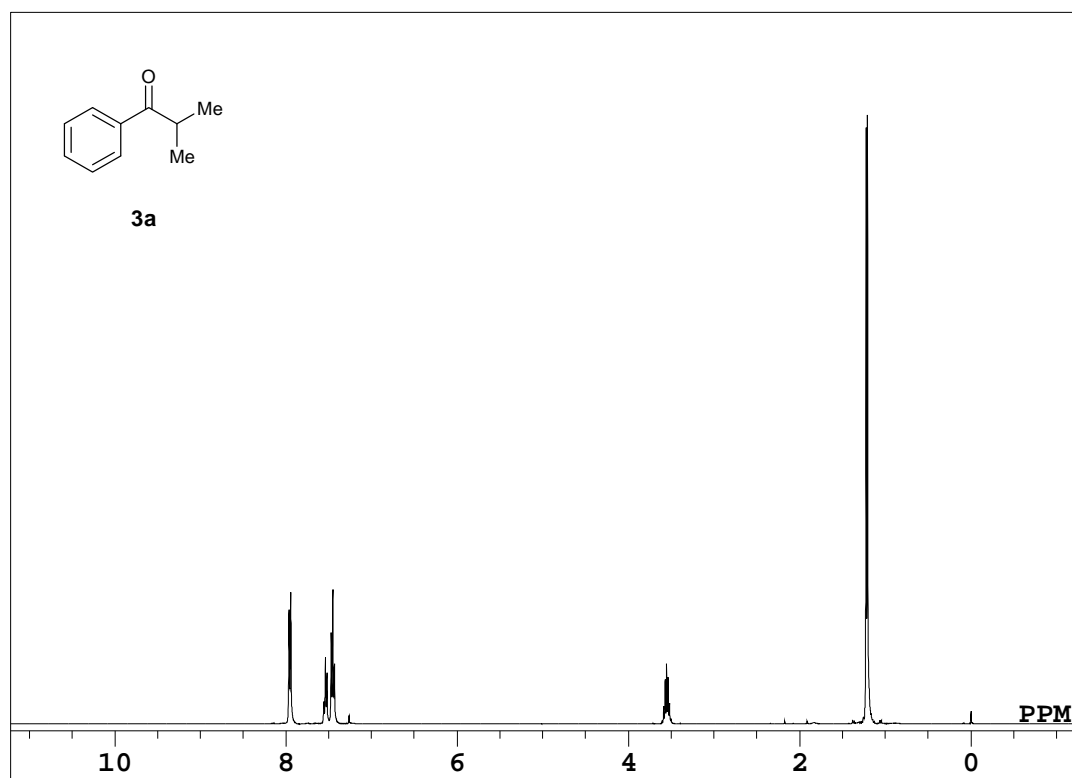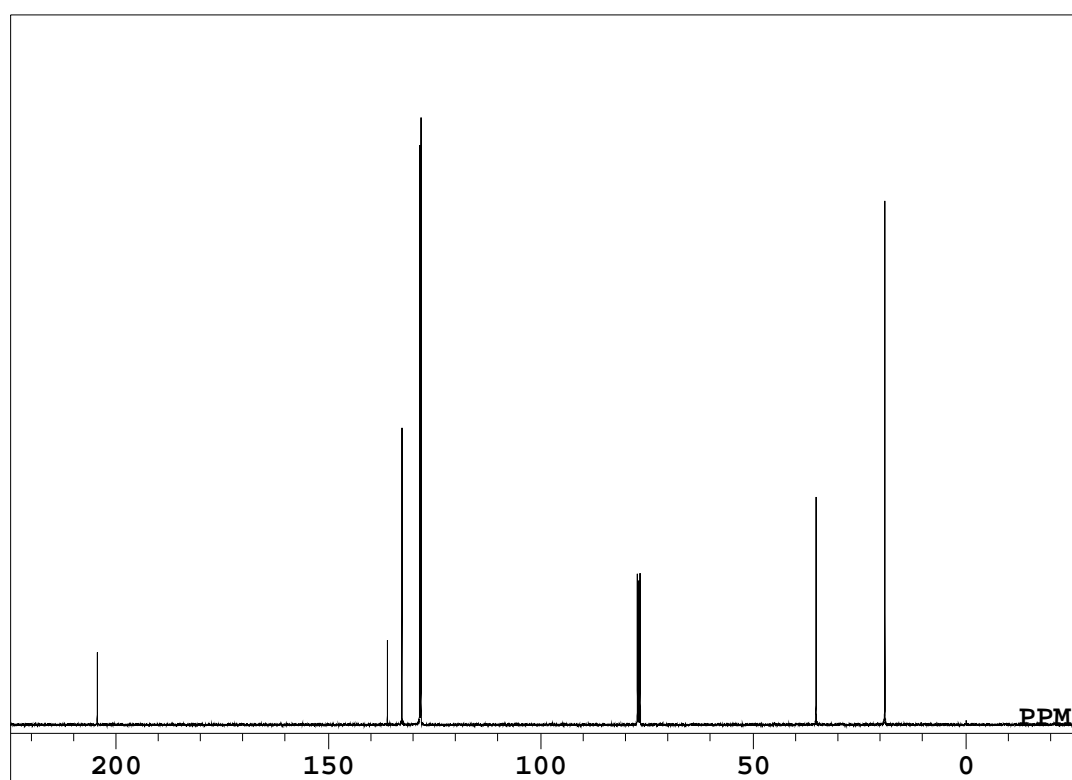

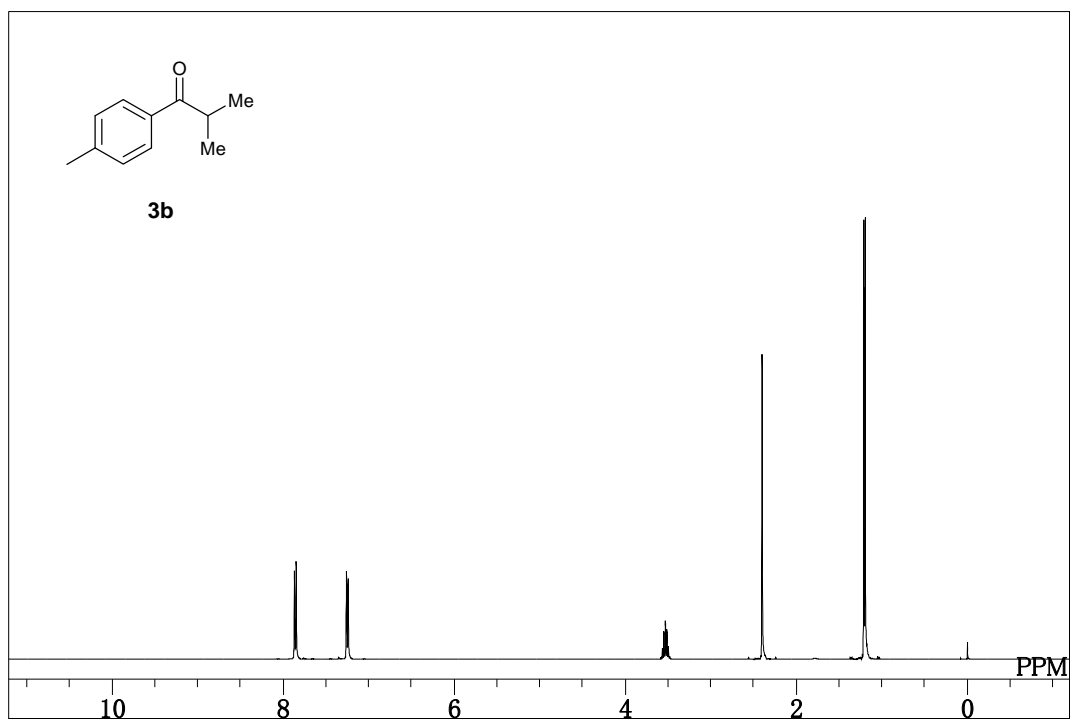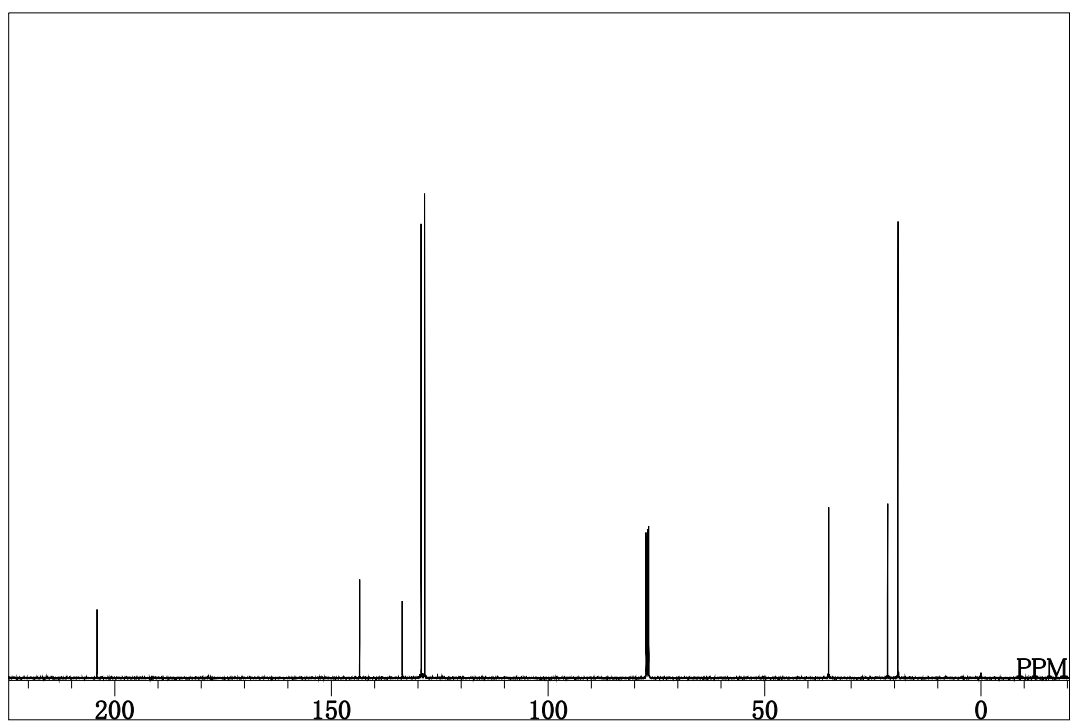

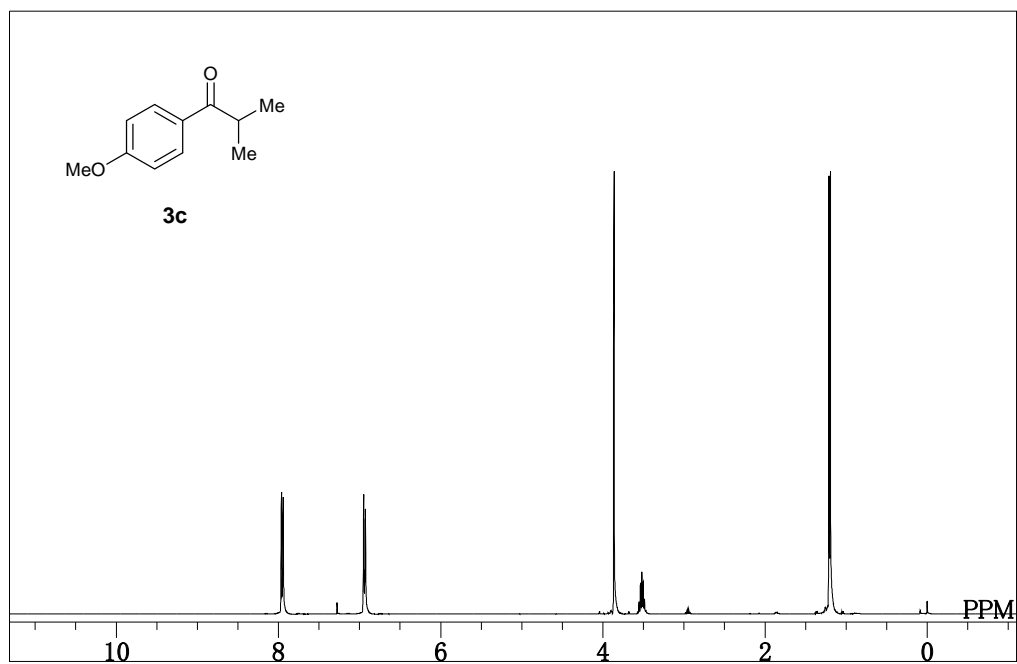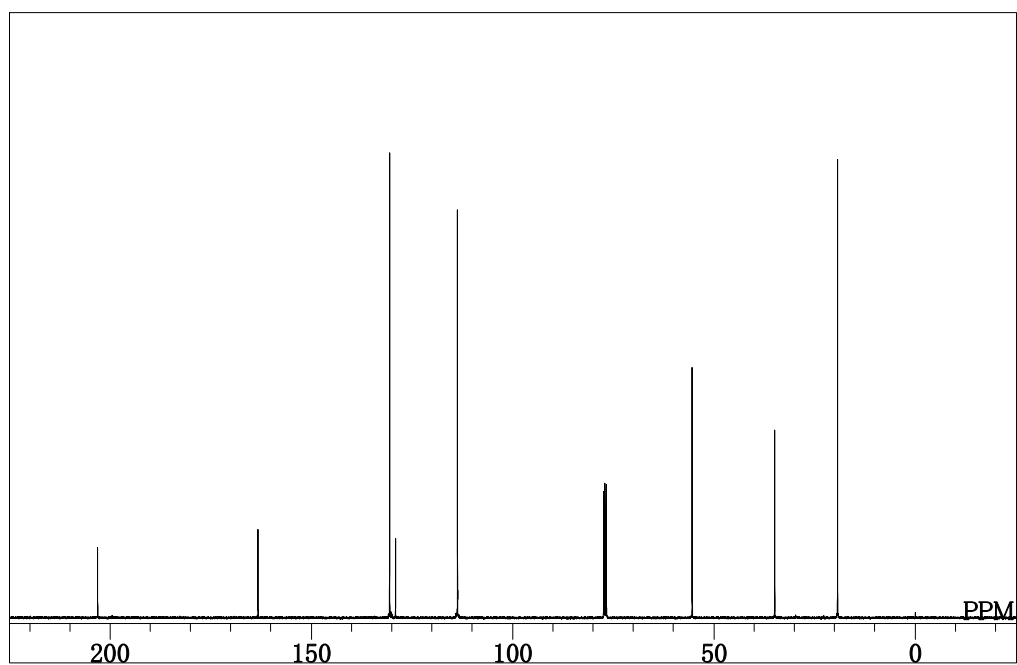

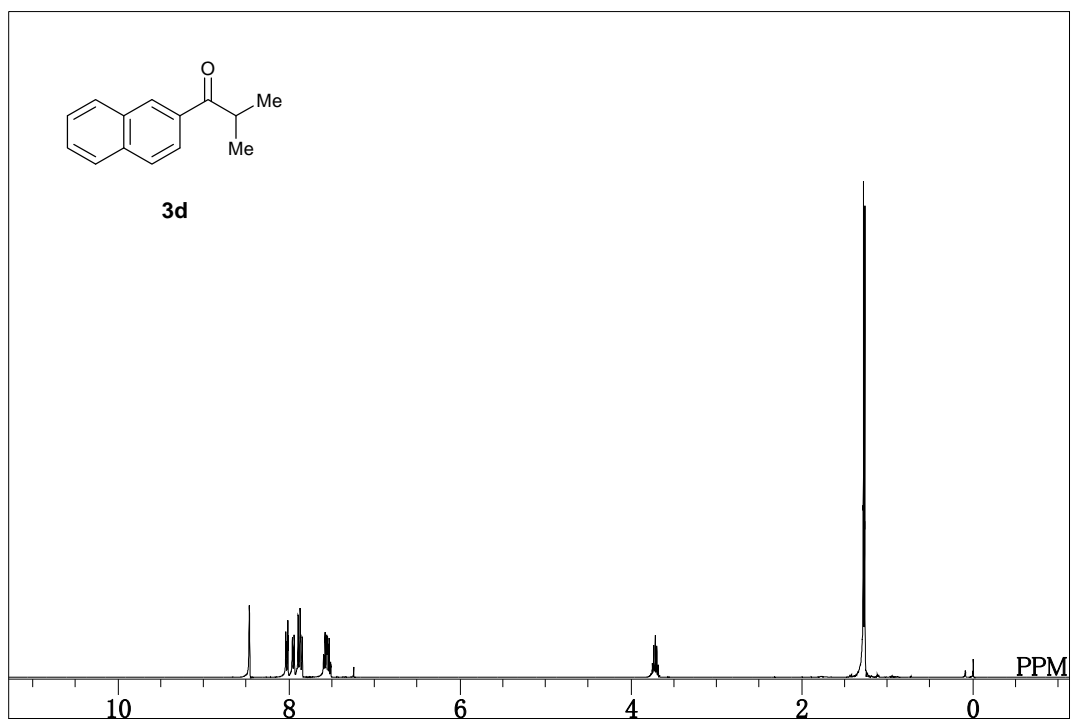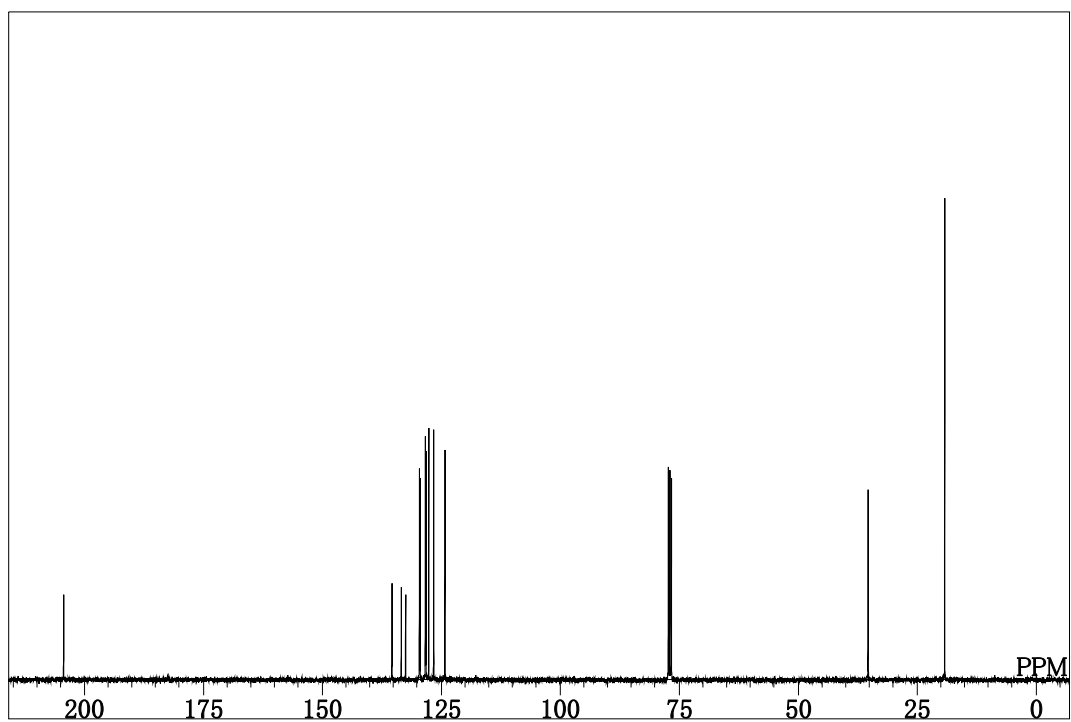



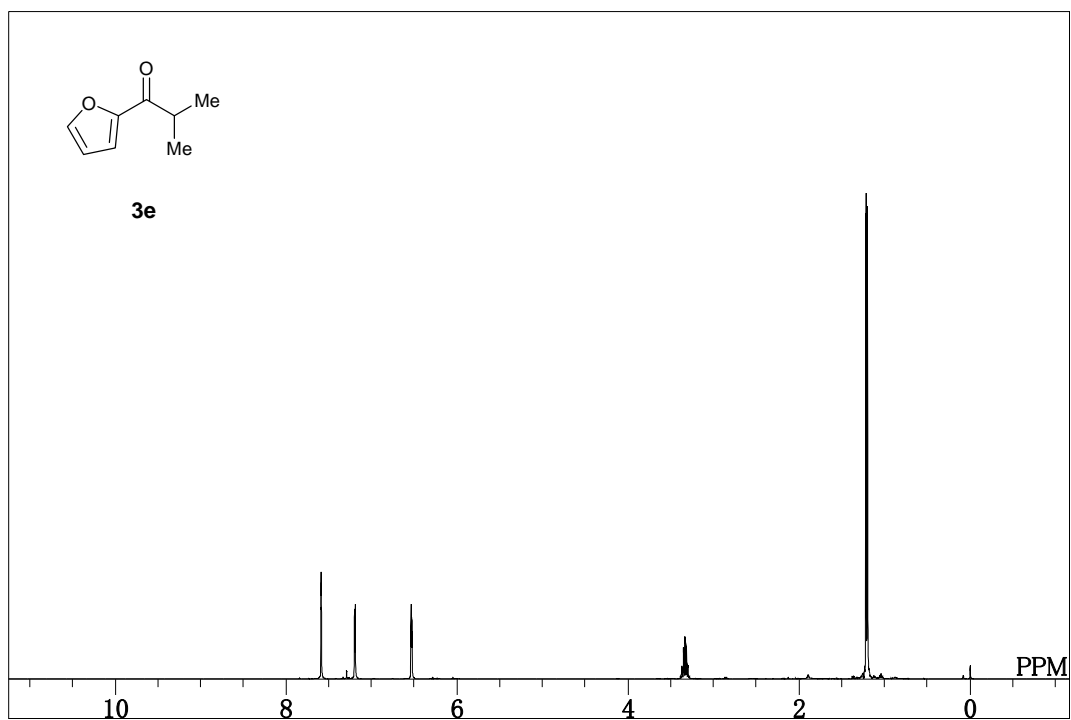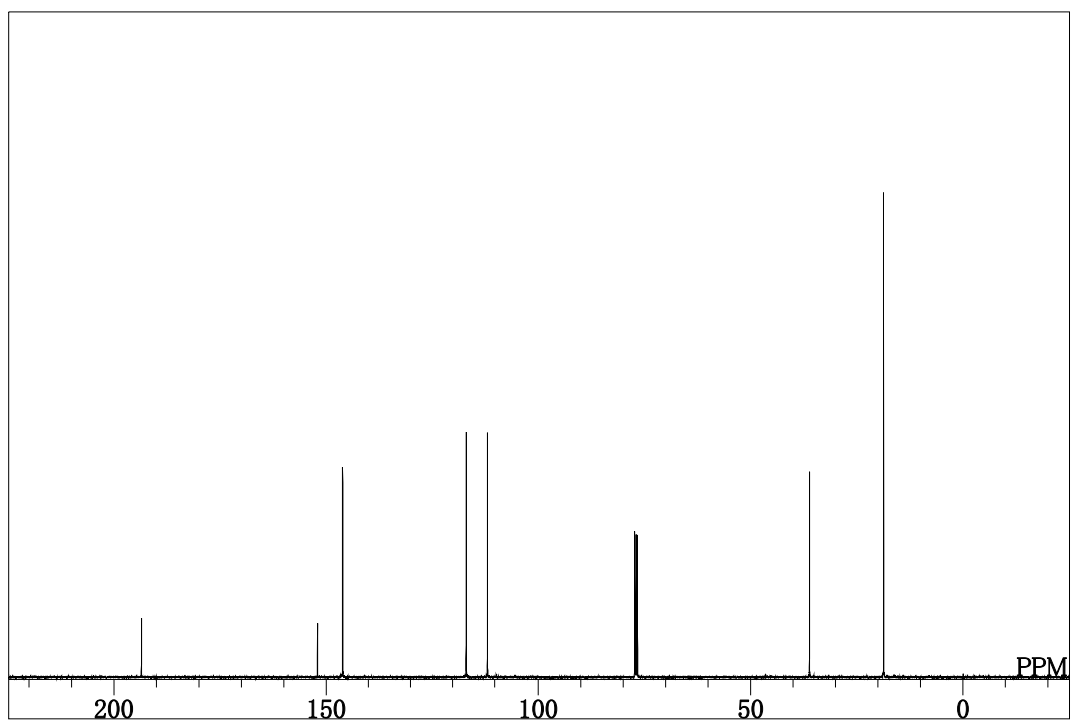

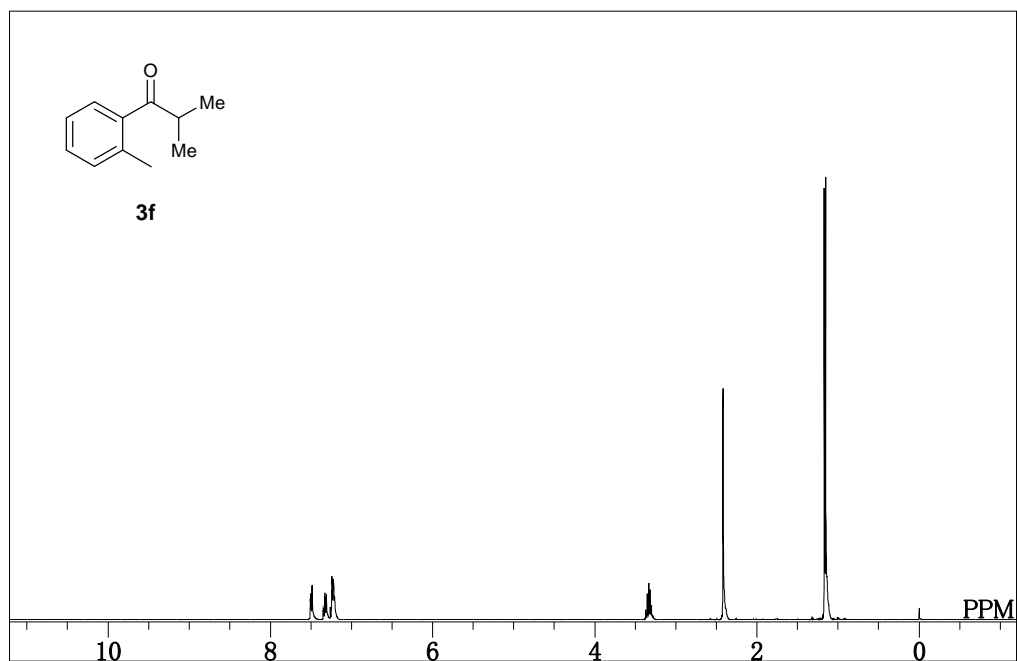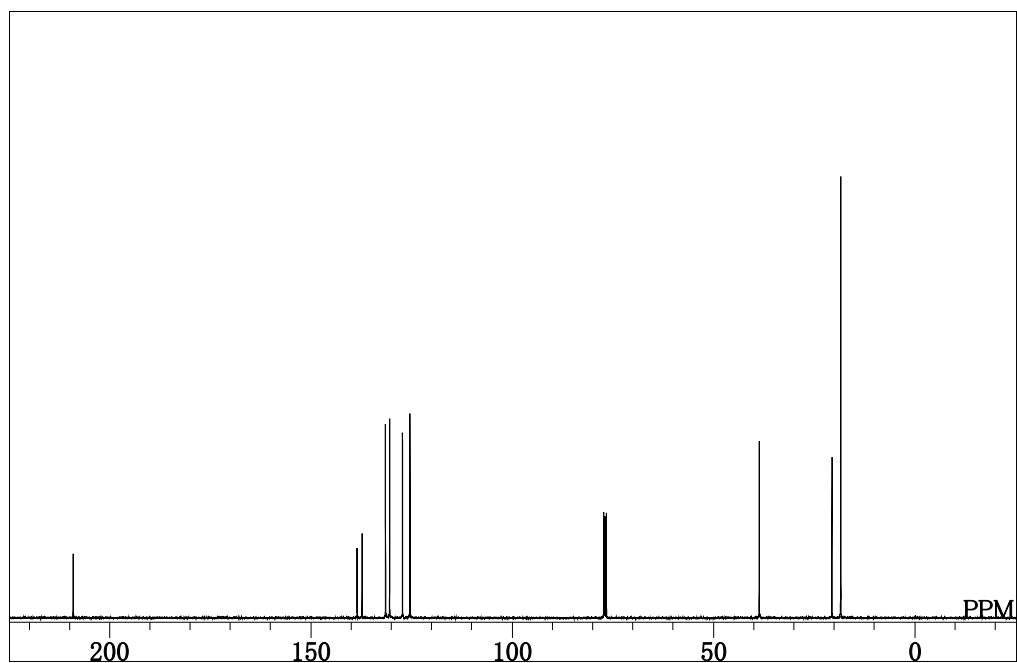

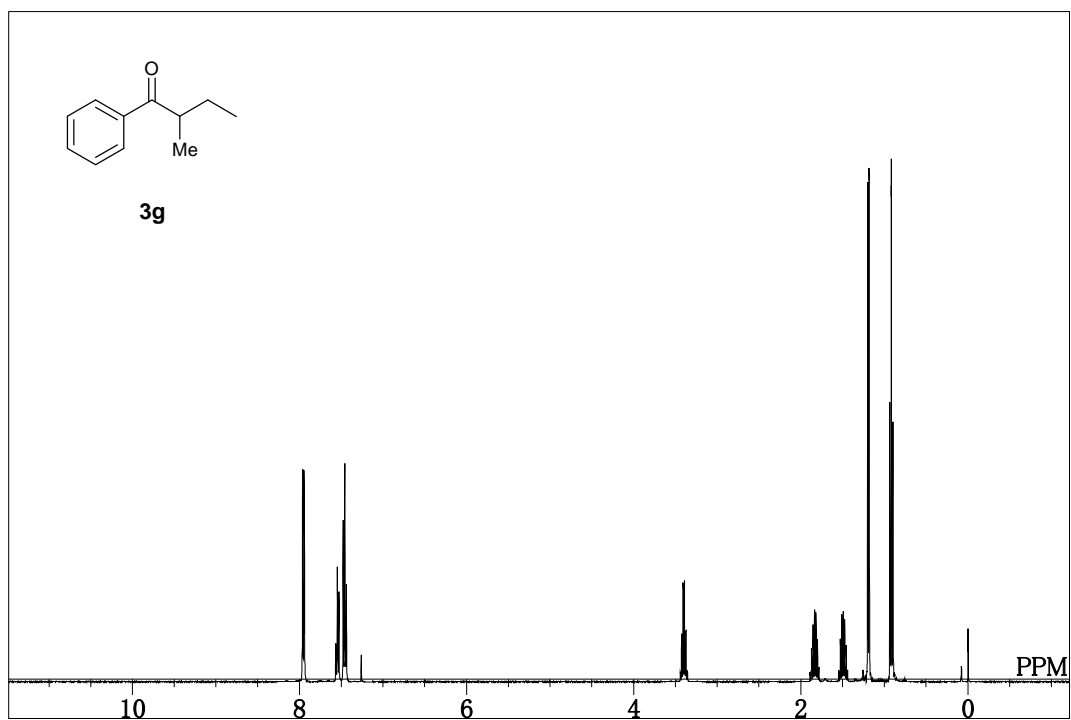

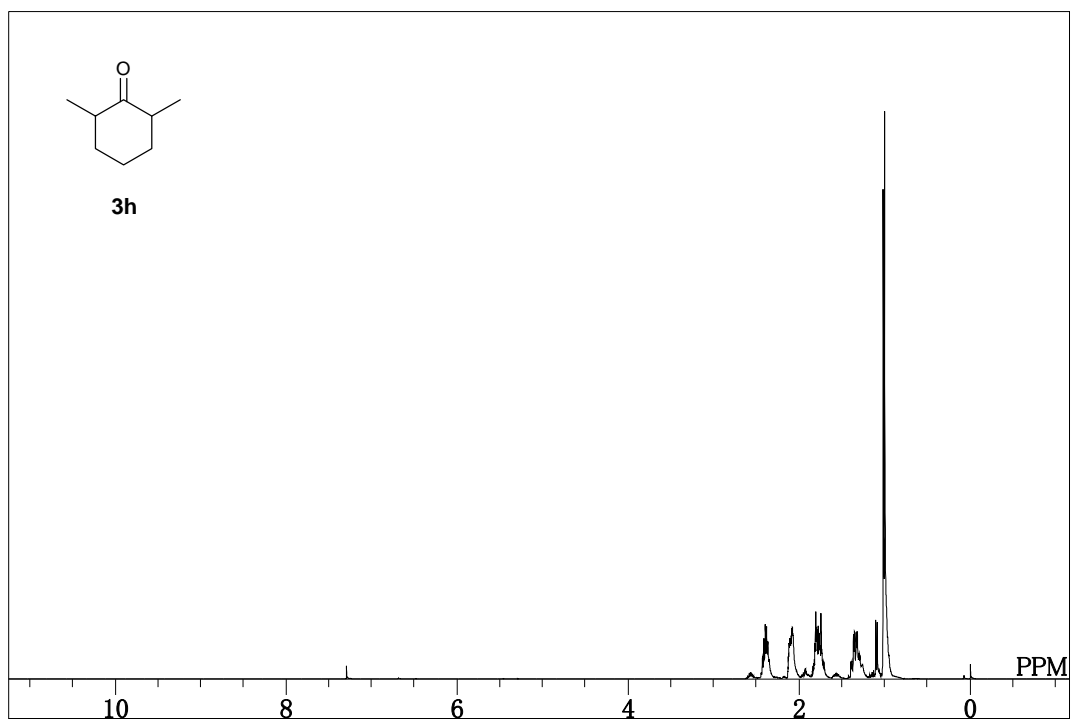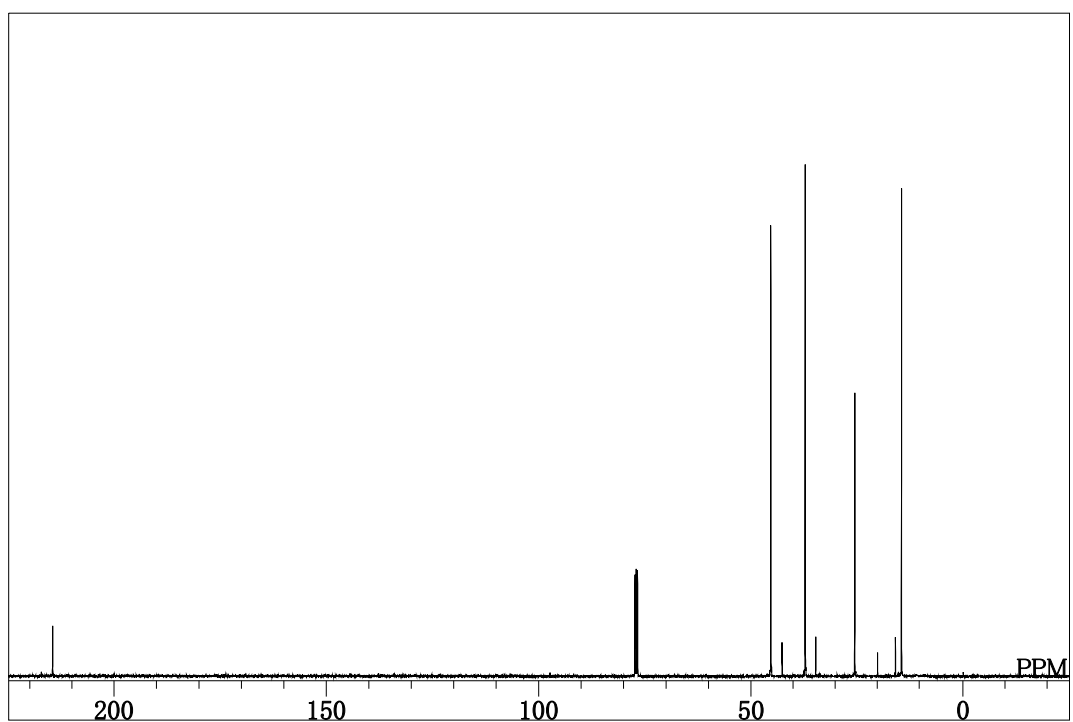

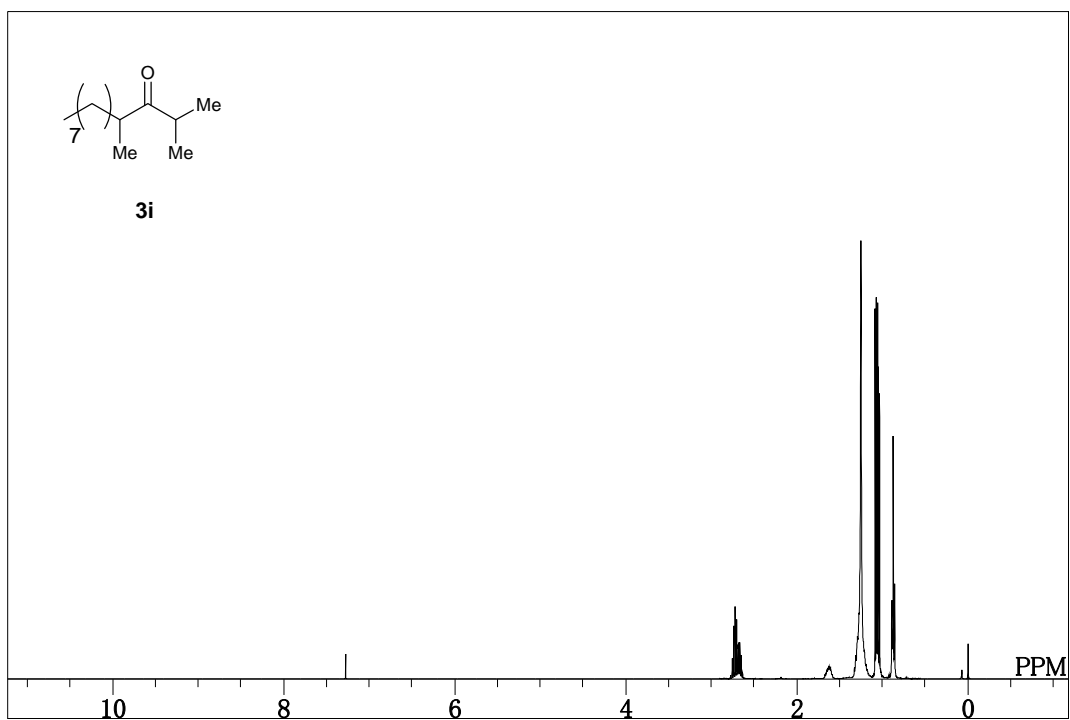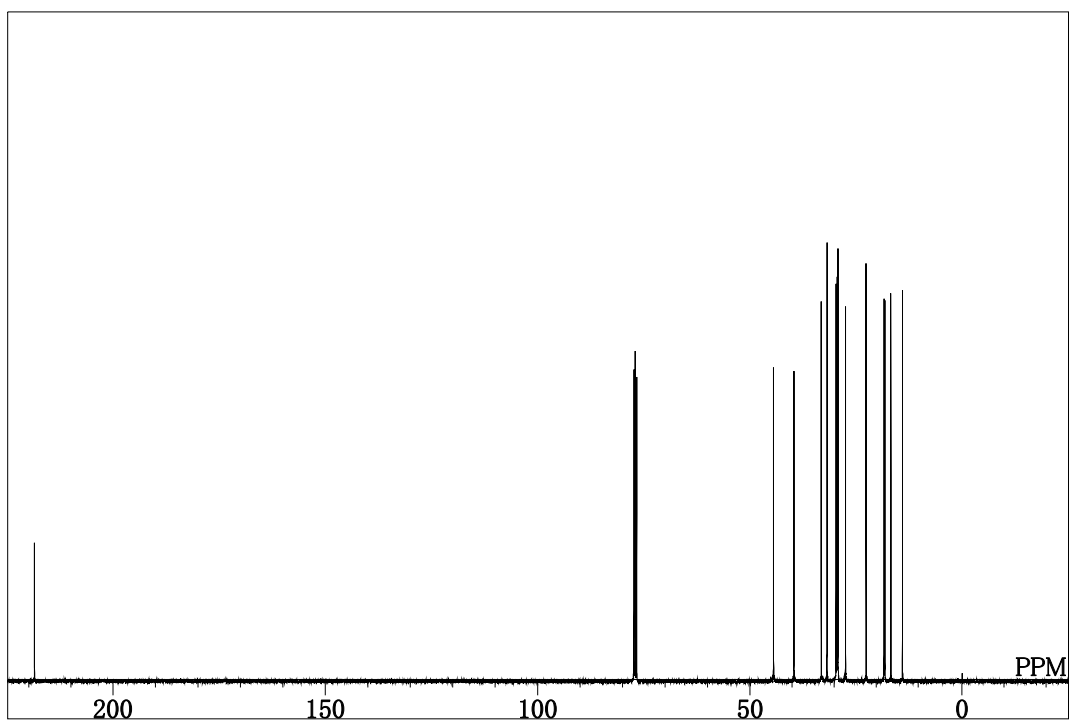

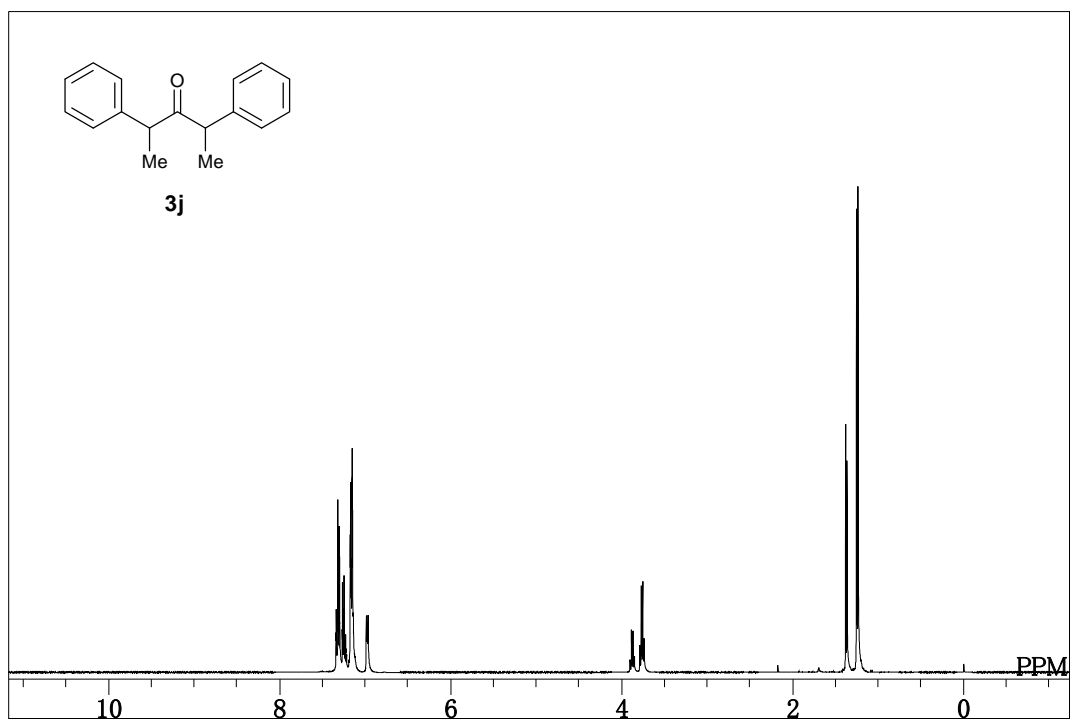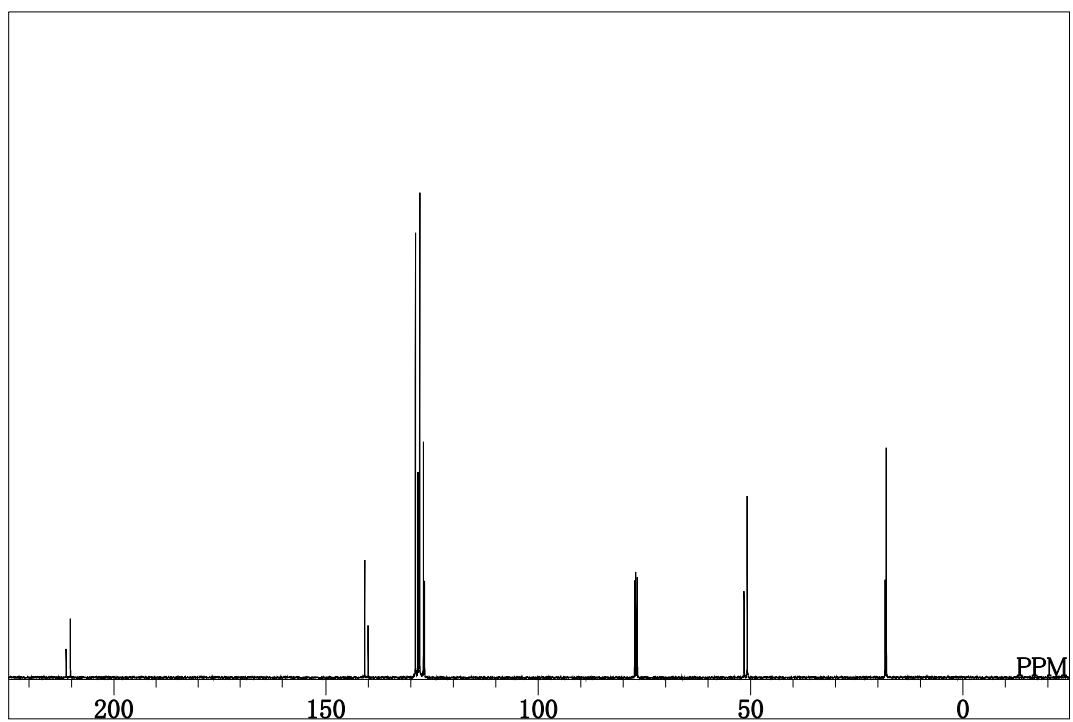

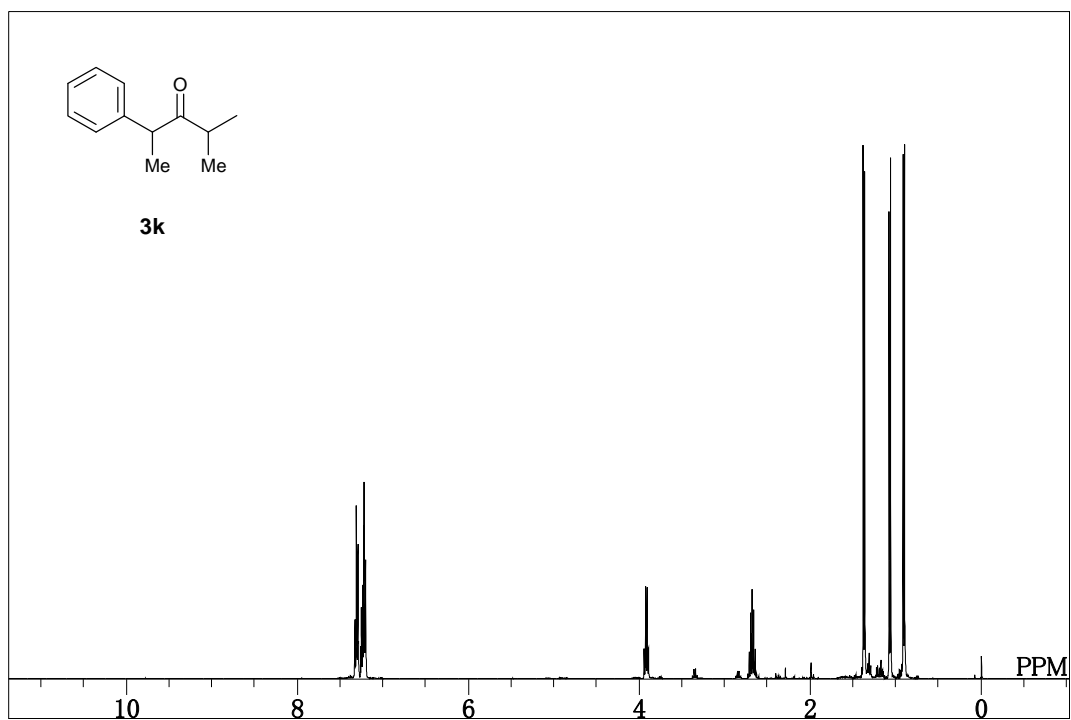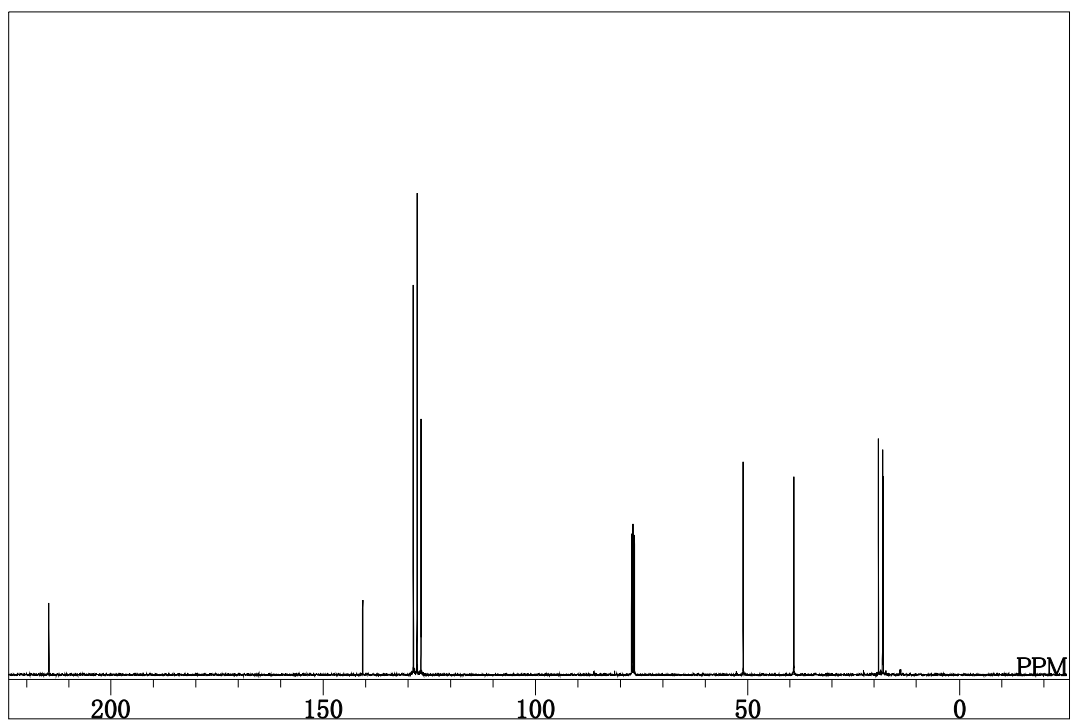

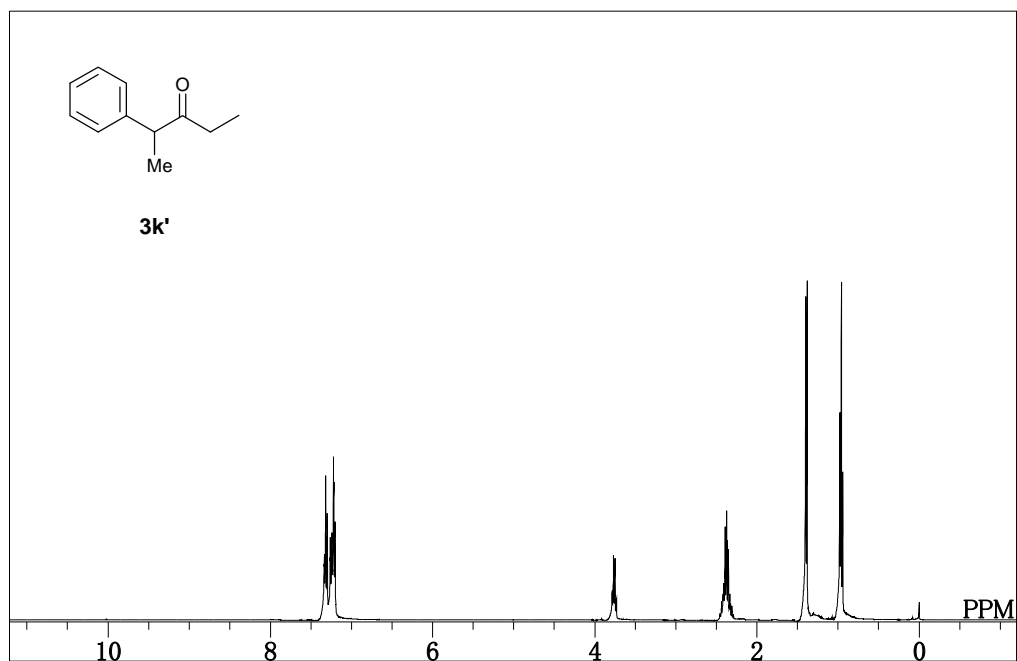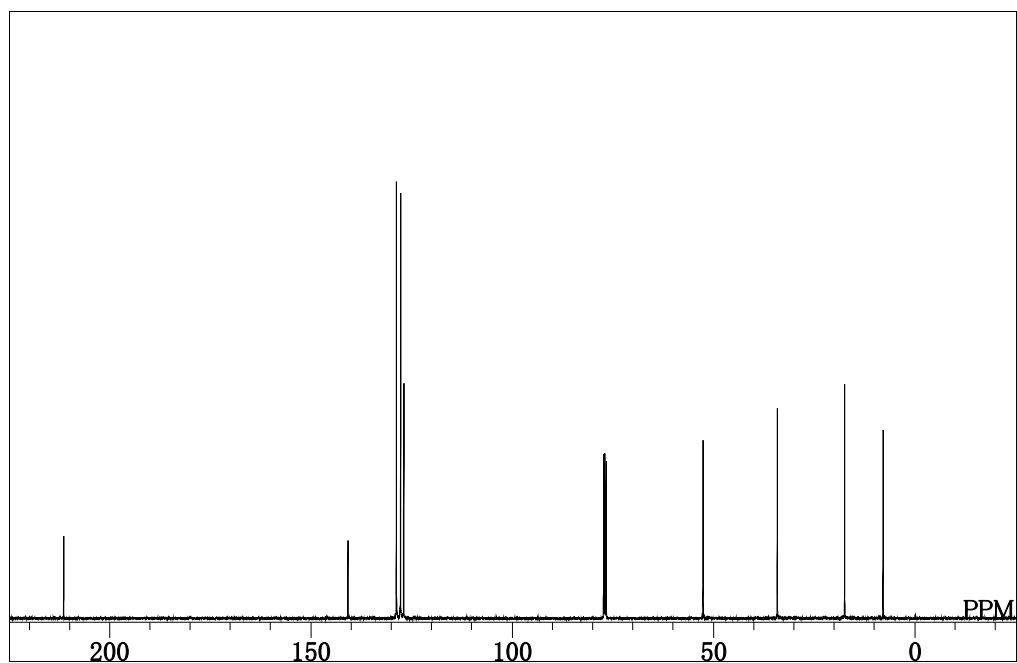



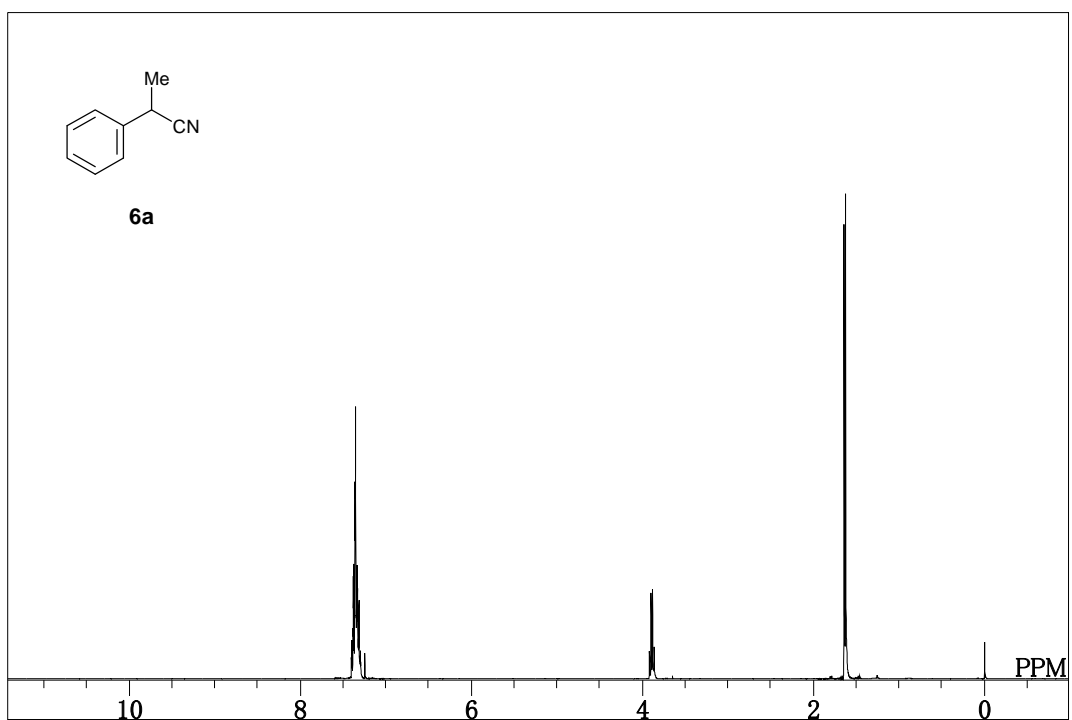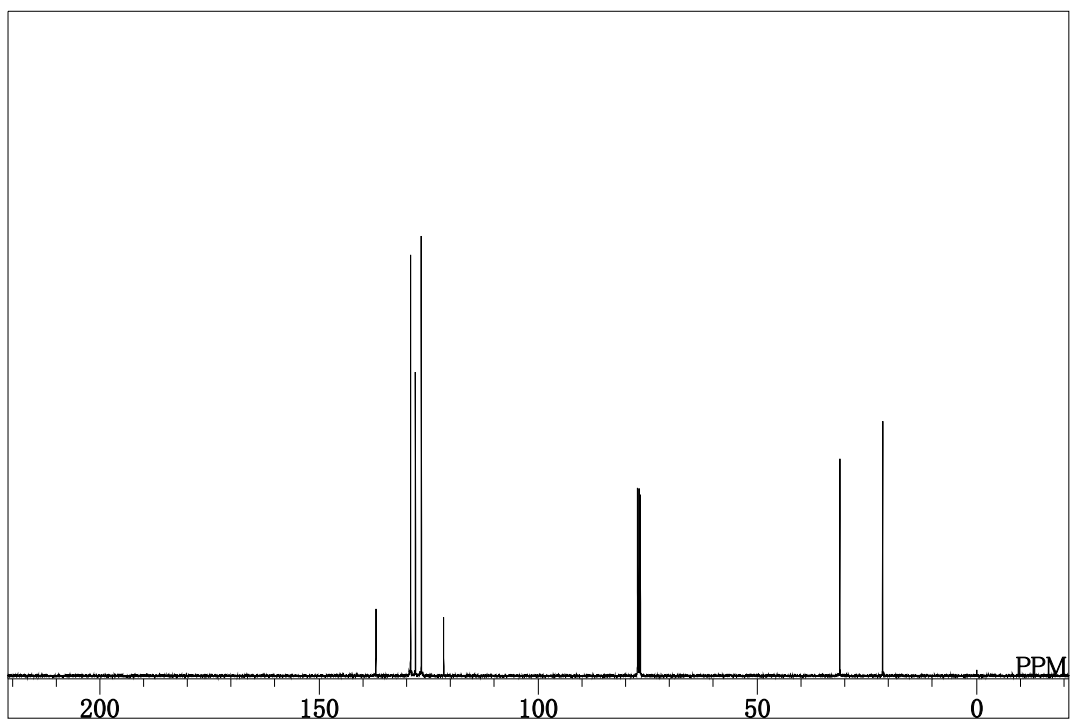

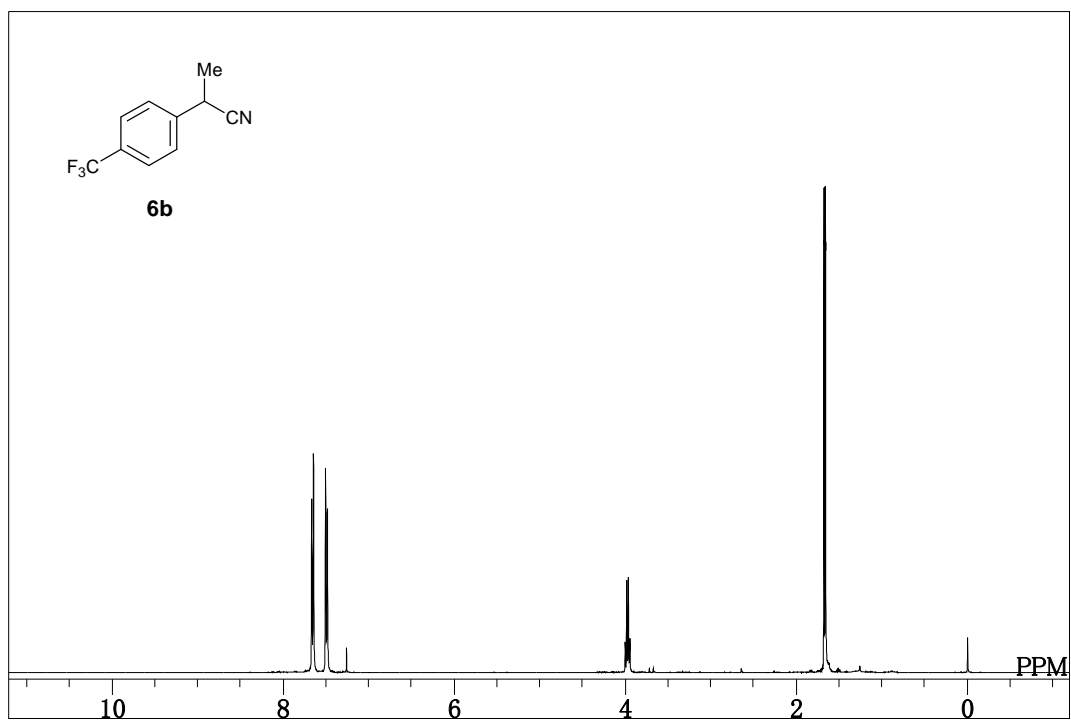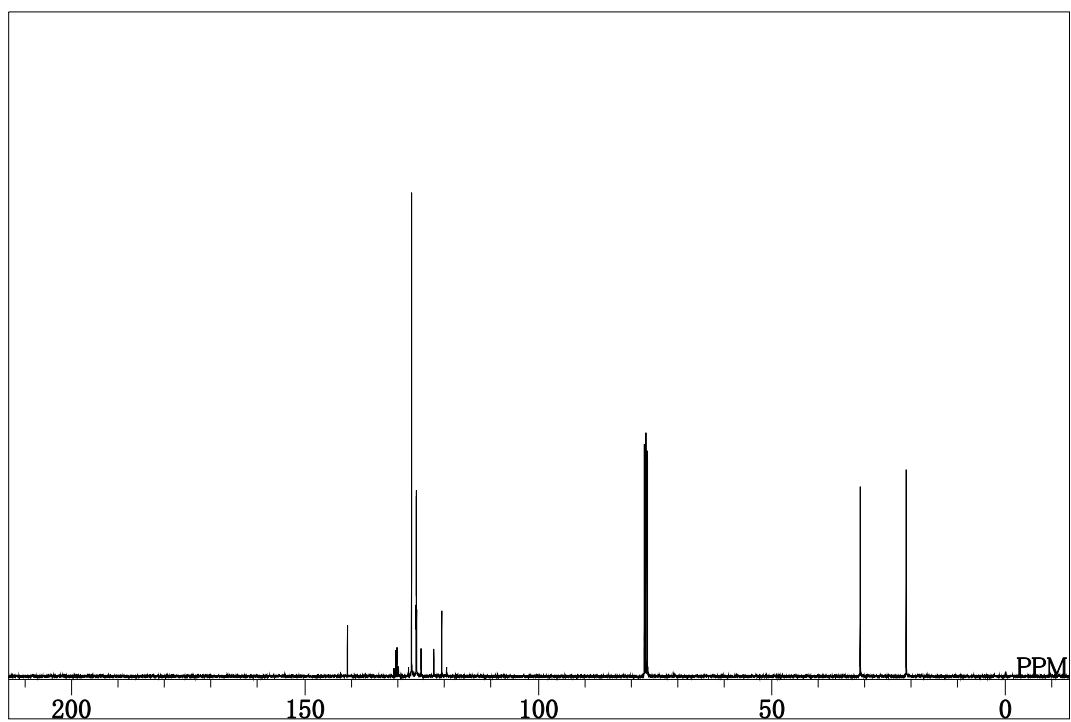

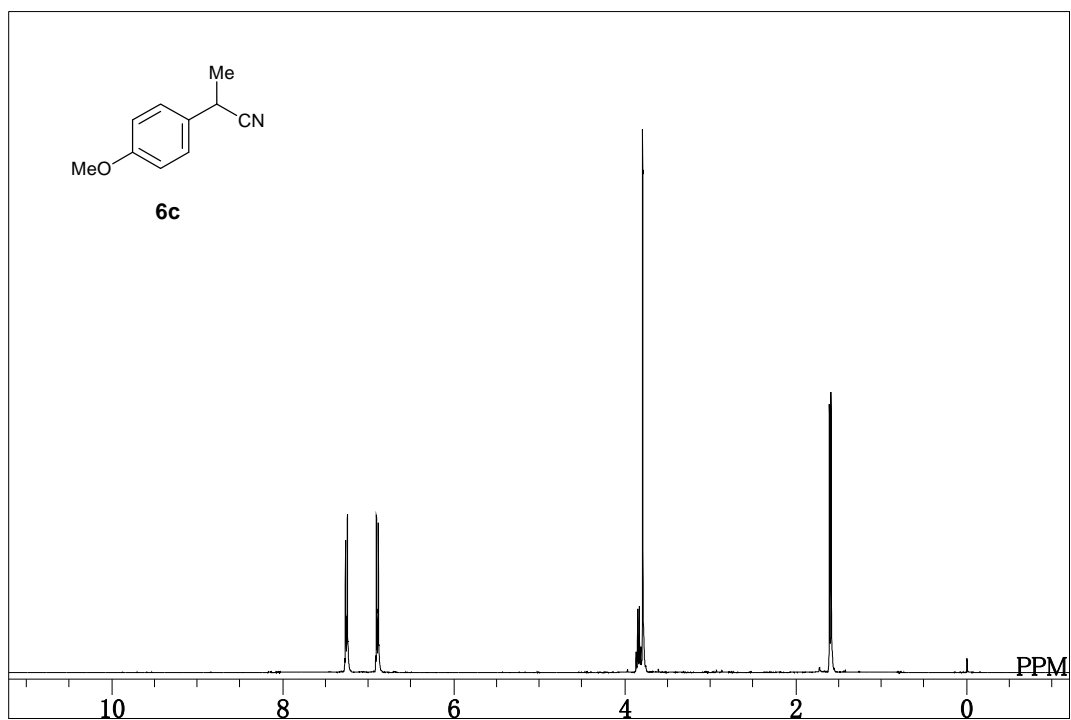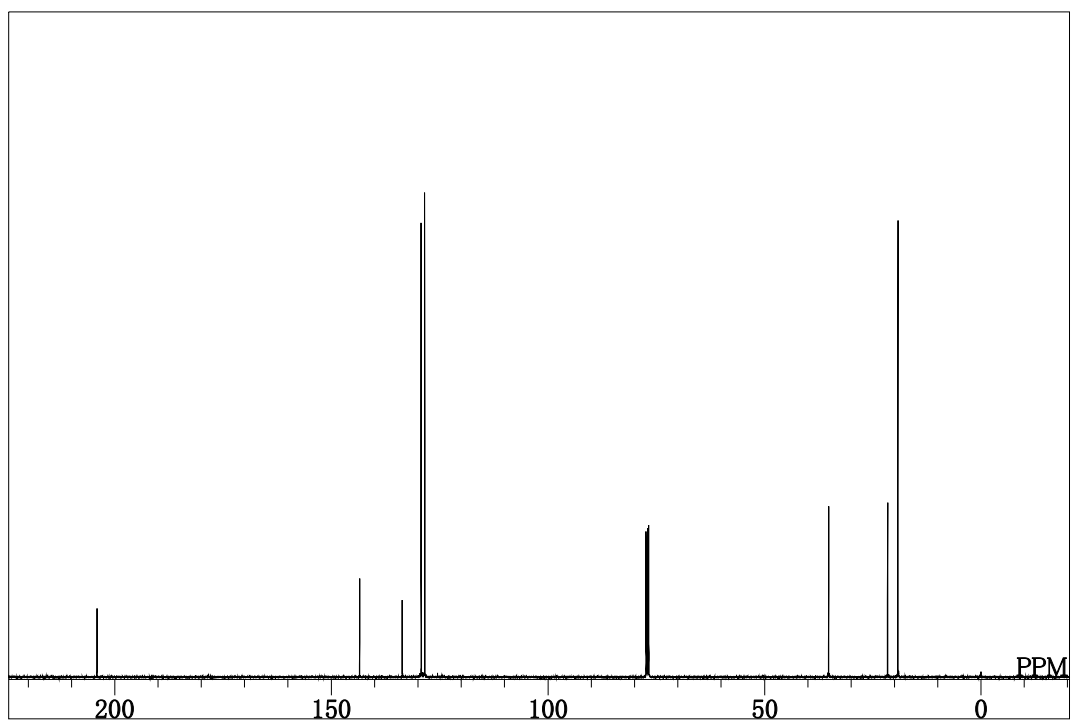

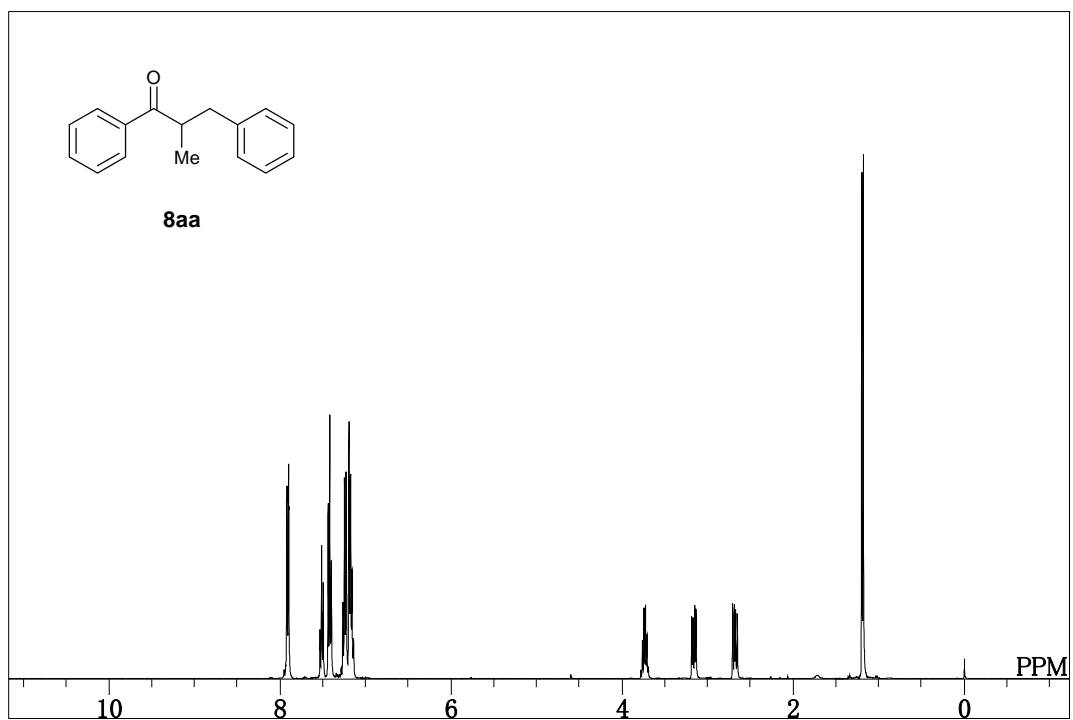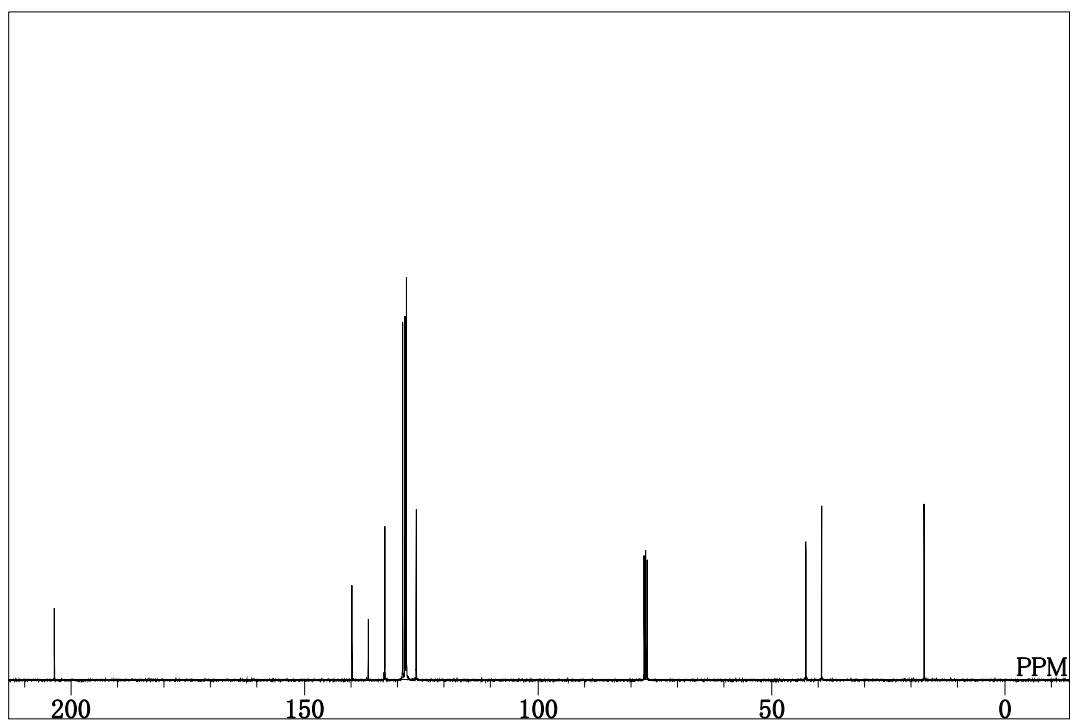

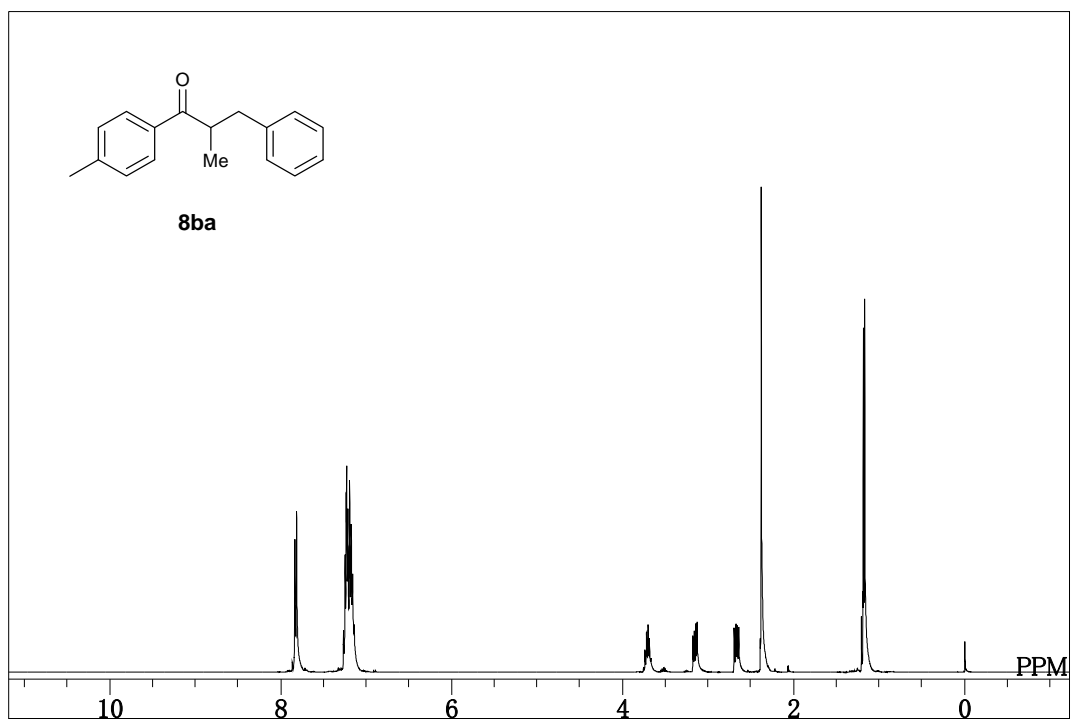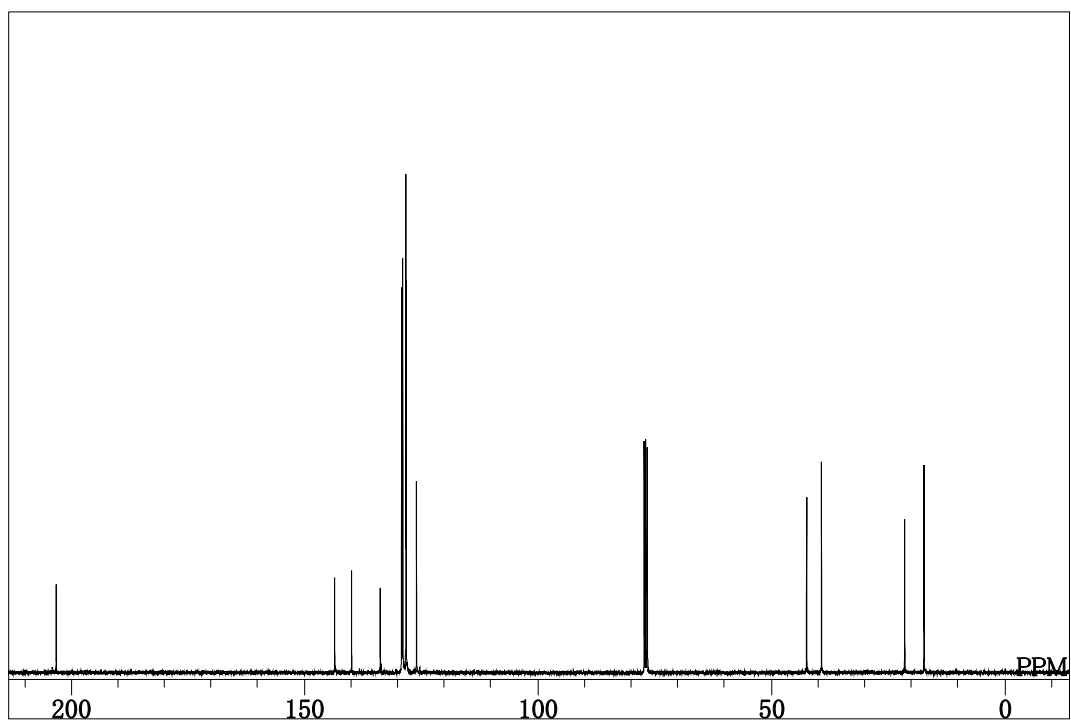

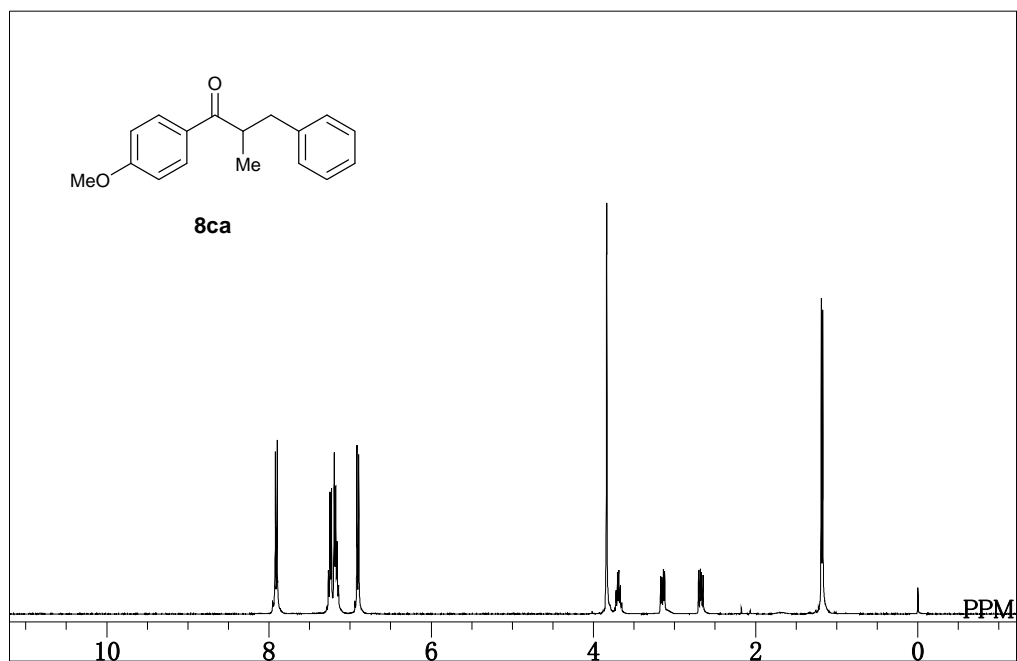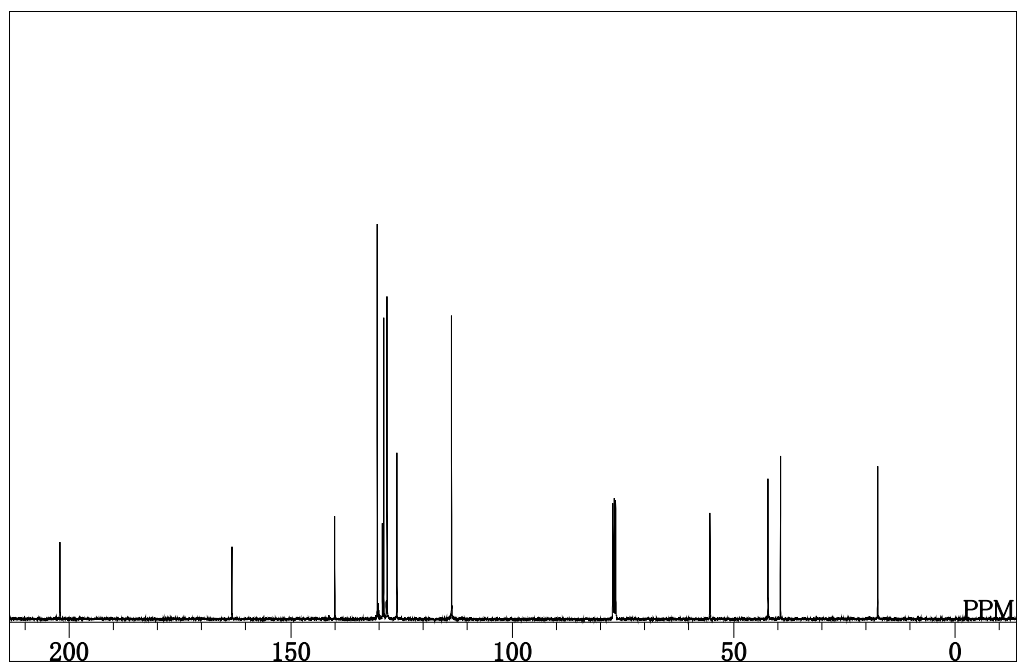

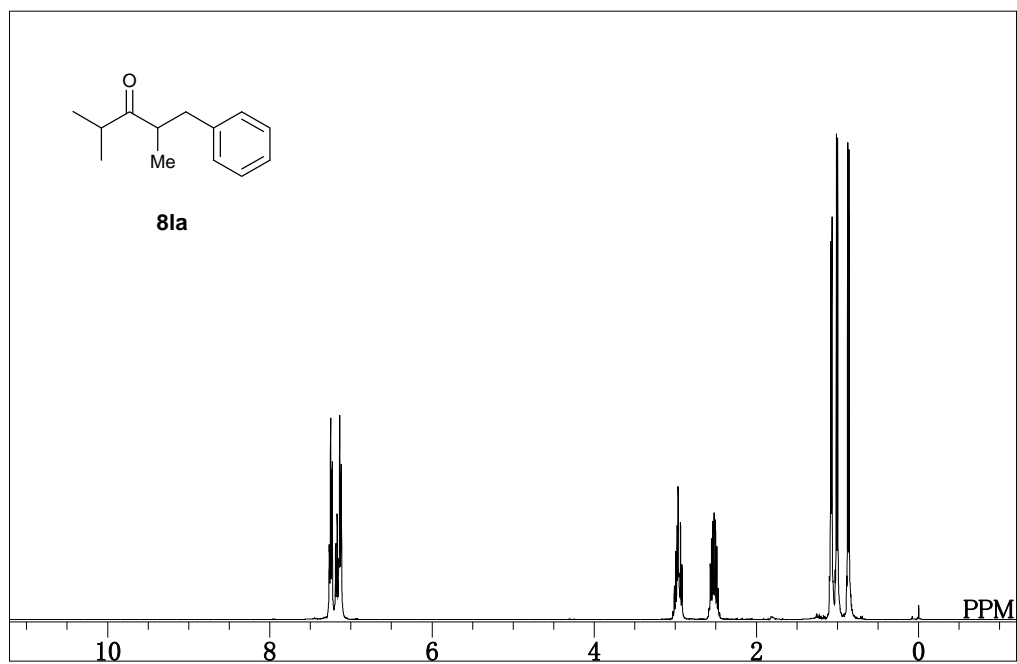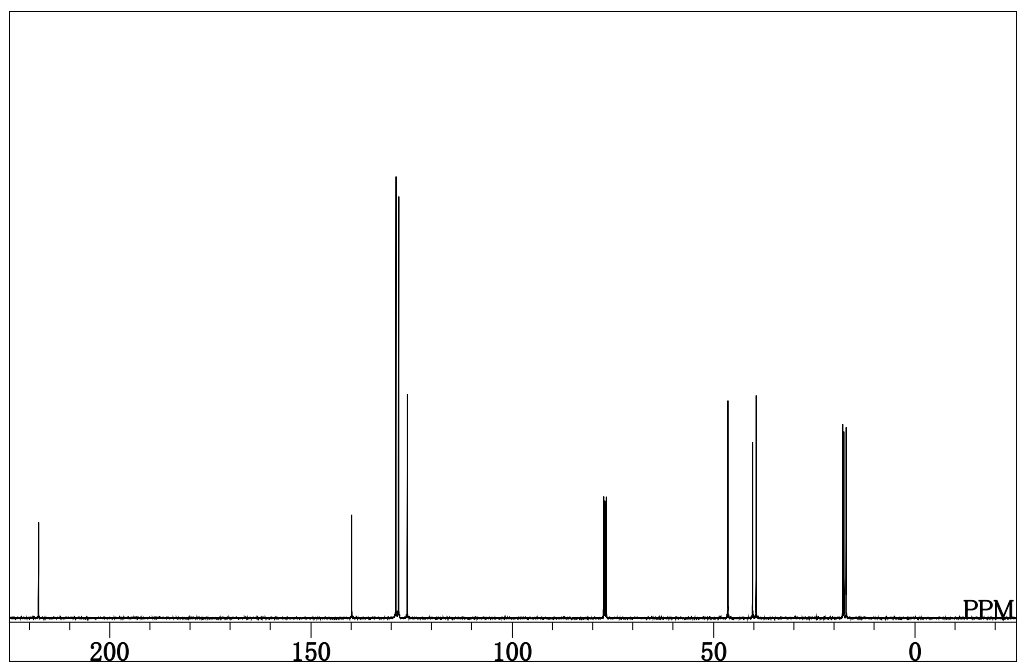

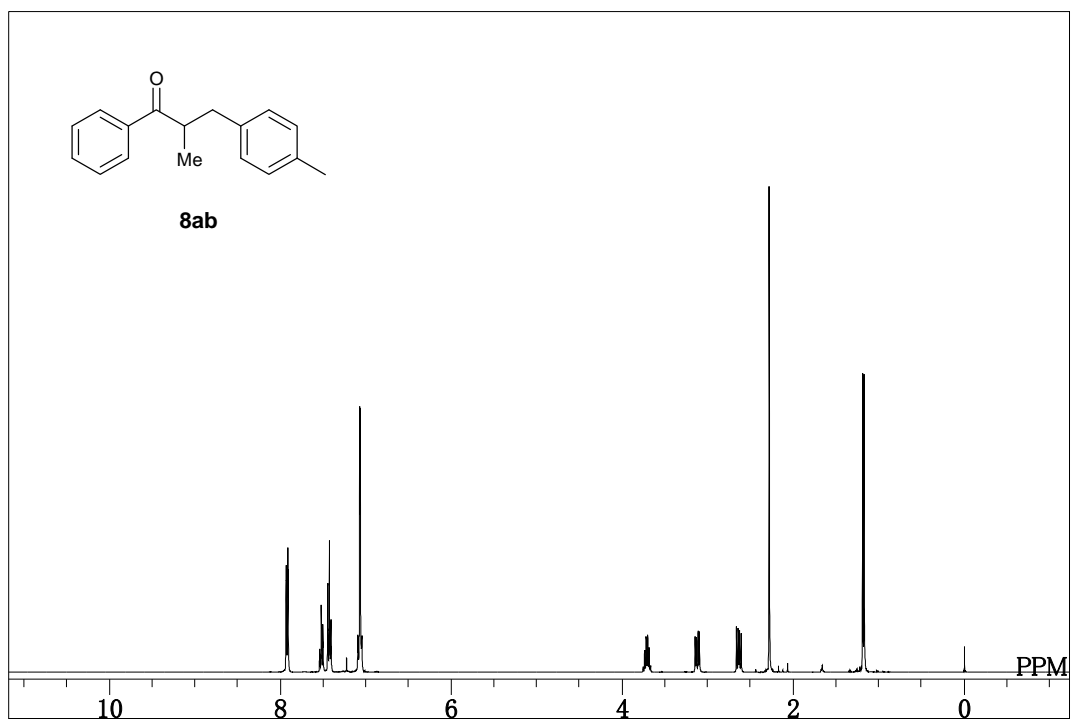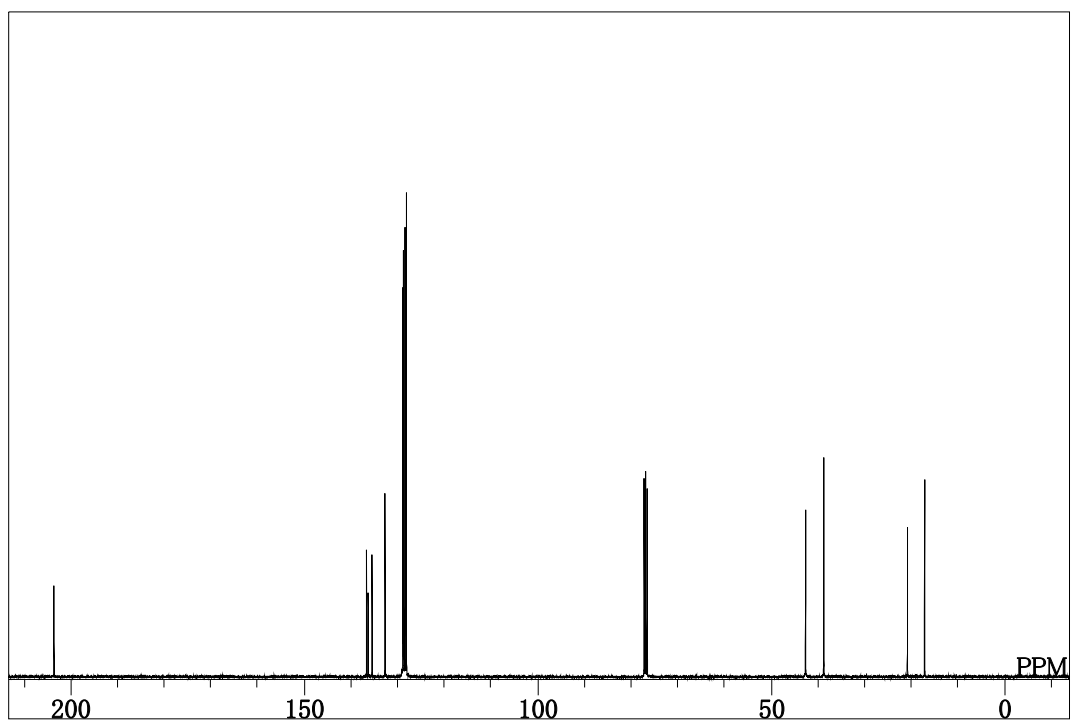



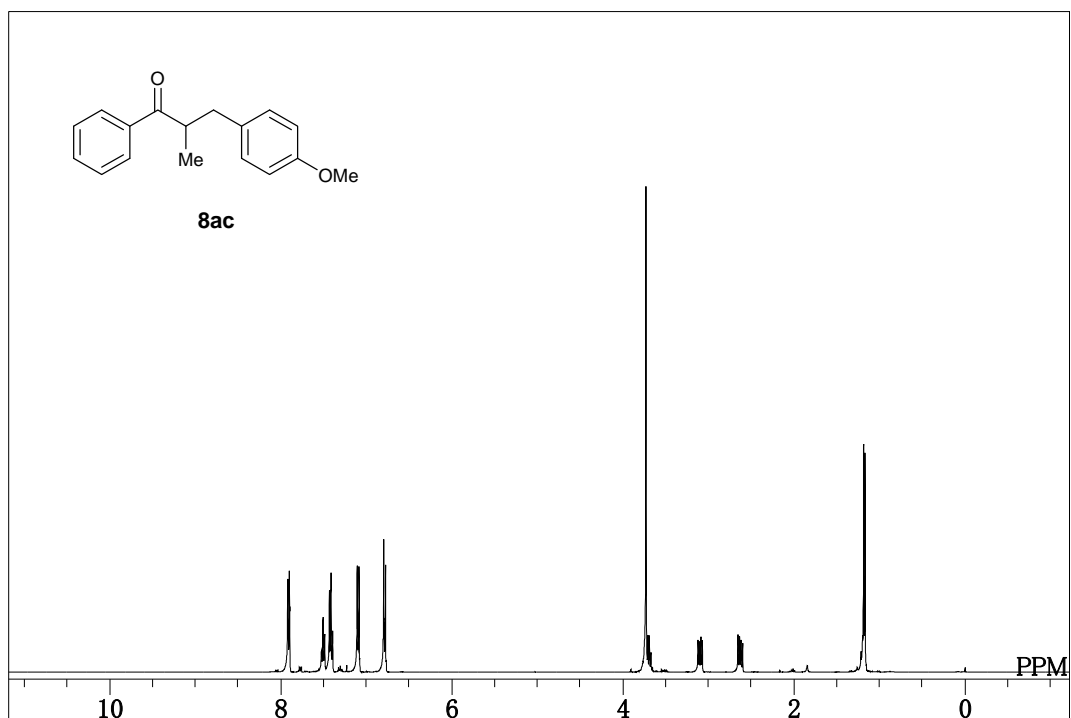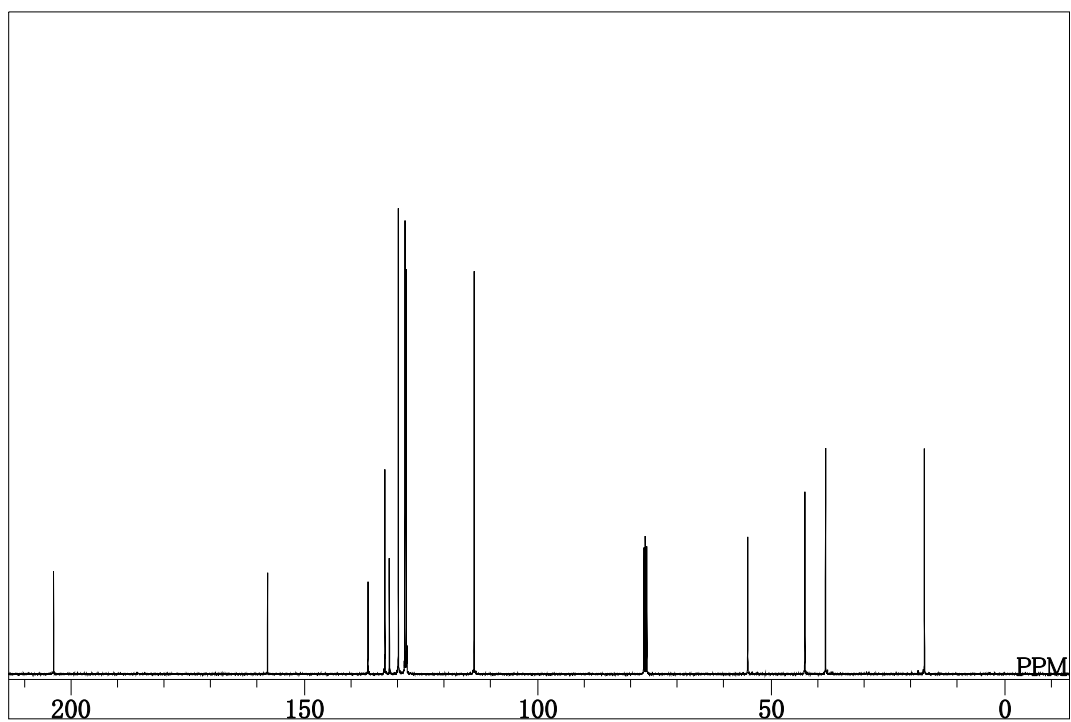

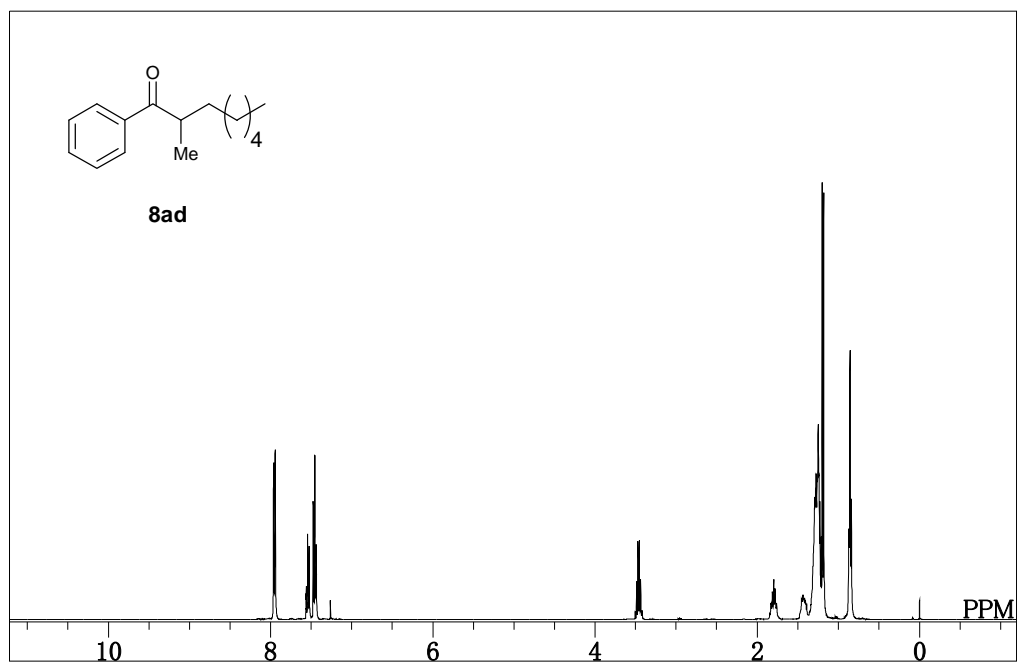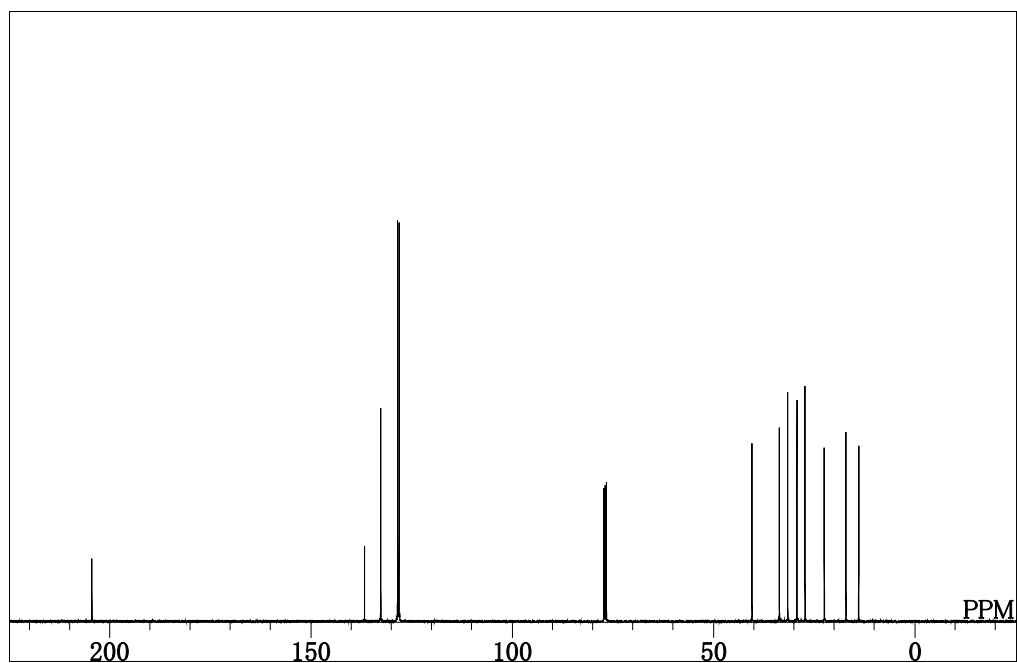

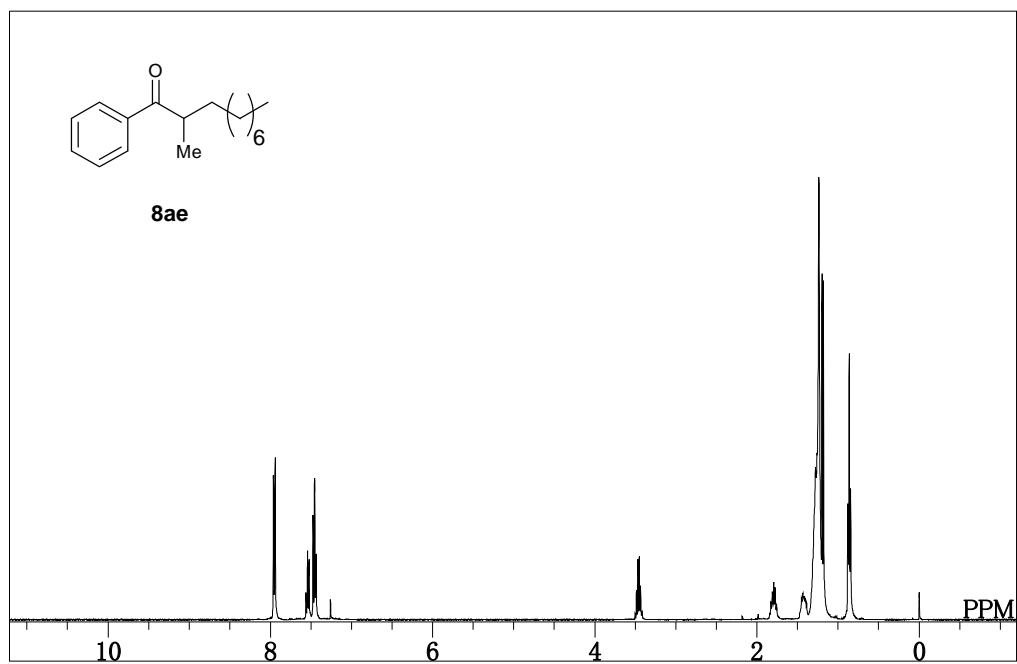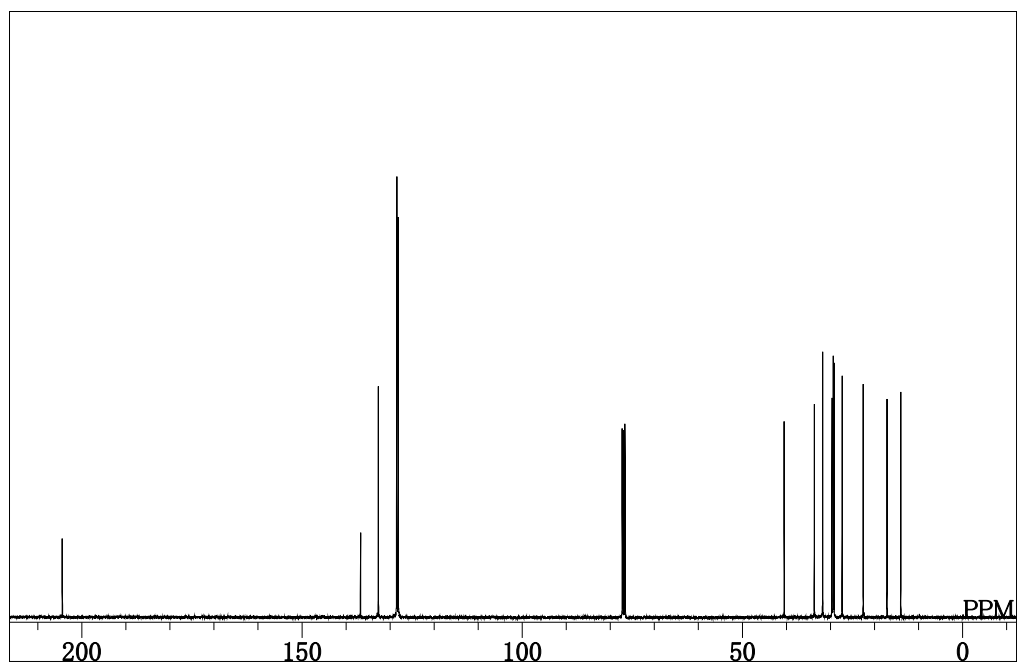

Supplement: c3cc49626k.pdf [file c3cc49626k.pdf]
